# Supplementary material for: Independent association between low serum amylase and non-alcoholic fatty liver disease in asymptomatic adults: a cross-sectional observational study
Source: PubMed Central journal article supplement — BMJ Open. 2013 Jan 3;3(1):e002235. doi: 10.1136/bmjopen-2012-002235 (PMC3549261; doi:10.1136/bmjopen-2012-002235), 2013-01-03

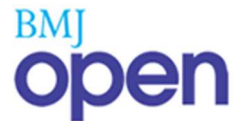

**Independent association between low serum amylase and non-alcoholic fatty liver disease in asymptomatic adults: A cross-sectional observational study**

|                                 |                                                                                                                                                                                                                                                                                                                                                                                                                                                                                                                                                                                                                                                                                                                                                                                                                                                           |
|---------------------------------|-----------------------------------------------------------------------------------------------------------------------------------------------------------------------------------------------------------------------------------------------------------------------------------------------------------------------------------------------------------------------------------------------------------------------------------------------------------------------------------------------------------------------------------------------------------------------------------------------------------------------------------------------------------------------------------------------------------------------------------------------------------------------------------------------------------------------------------------------------------|
| Journal:                        | <i>BMJ Open</i>                                                                                                                                                                                                                                                                                                                                                                                                                                                                                                                                                                                                                                                                                                                                                                                                                                           |
| Manuscript ID:                  | bmjopen-2012-002235                                                                                                                                                                                                                                                                                                                                                                                                                                                                                                                                                                                                                                                                                                                                                                                                                                       |
| Article Type:                   | Research                                                                                                                                                                                                                                                                                                                                                                                                                                                                                                                                                                                                                                                                                                                                                                                                                                                  |
| Date Submitted by the Author:   | 18-Oct-2012                                                                                                                                                                                                                                                                                                                                                                                                                                                                                                                                                                                                                                                                                                                                                                                                                                               |
| Complete List of Authors:       | Nakajima, Kei; Josai University, Department of Medical Dietetics, Faculty of Pharmaceutical Sciences<br>Oshida, Haruki; Josai University, Department of Medical Dietetics, Faculty of Pharmaceutical Sciences<br>Muneyuki, Toshitaka; Jichi Medical University School of Medicine, First Department of Comprehensive Medicine<br>Saito, Masafumi; Josai University, Department of Medical Dietetics, Faculty of Pharmaceutical Sciences<br>Hori, Yumiko; Josai University, Department of Medical Dietetics, Faculty of Pharmaceutical Sciences<br>Fuchugami, Hiroshi; Social Insurance Omiya General Hospital, Department of Health Care Center<br>Munakata, Hiromi; Social Insurance Omiya General Hospital, Department of Internal Medicine<br>Takei, Masafumi; Jichi Medical University School of Medicine, First Department of Comprehensive Medicine |
| <b>Primary Subject Heading</b>: | Epidemiology                                                                                                                                                                                                                                                                                                                                                                                                                                                                                                                                                                                                                                                                                                                                                                                                                                              |
| Secondary Subject Heading:      | Gastroenterology and hepatology, Nutrition and metabolism, Diabetes and endocrinology                                                                                                                                                                                                                                                                                                                                                                                                                                                                                                                                                                                                                                                                                                                                                                     |
| Keywords:                       | Clinical Epidemiology, Cross sectional studies, Diabetes & endocrinology < INTERNAL MEDICINE, Gastroenterology < INTERNAL MEDICINE, Hepatology < INTERNAL MEDICINE                                                                                                                                                                                                                                                                                                                                                                                                                                                                                                                                                                                                                                                                                        |
|                                 |                                                                                                                                                                                                                                                                                                                                                                                                                                                                                                                                                                                                                                                                                                                                                                                                                                                           |

SCHOLARONE™  
Manuscripts

1  
2  
3  
4  
5  
6  
7  
8  
9  
10  
11  
12  
13  
14  
15  
16  
17  
18  
19  
20  
21  
22  
23  
24  
25  
26  
27  
28  
29  
30  
31  
32  
33  
34  
35  
36  
37  
38  
39  
40  
41  
42  
43  
44  
45  
46  
47  
48  
49  
50  
51  
52  
53  
54  
55  
56  
57  
58  
59  
60

**Independent association between low serum amylase and non-alcoholic fatty liver disease in asymptomatic adults: A cross-sectional observational study**

Short title: Low serum amylase and non-alcoholic fatty liver disease

Kei Nakajima<sup>1,4\*</sup>, Haruki Oshida,<sup>1</sup> Toshitaka Muneyuki,<sup>2</sup> Masafumi Saito,<sup>1</sup>

Yumiko Hori,<sup>1</sup> Hiroshi Fuchugami,<sup>3</sup> Hiromi Munakata,<sup>4</sup> Masafumi Kakei<sup>2</sup>,

\*Correspondence to Kei Nakajima, M.D., Ph.D., Division of Clinical Nutrition,  
Department of Medical Dietetics, Faculty of Pharmaceutical Sciences, Josai University,  
1-1 Keyakidai, Sakado, Saitama, 350-0295, Japan

email: keinaka@josai.ac.jp, Tel +81-49-271-7260, Fax +81-49-271-7260

- 1 Division of Clinical Nutrition, Department of Medical Dietetics, Faculty of  
Pharmaceutical Sciences, Josai University, 1-1 Keyakidai, Sakado, Saitama,  
350-0295, Japan,
- 2 First Department of Comprehensive Medicine, Saitama Medical Center,  
Jichi Medical University School of Medicine, 1-847 Amanuma, Omiya,  
Saitama 330-8503, Japan
- 3 Department of Health Care Center, Social Insurance Omiya General Hospital,  
453 Bonsai, Kita, Saitama, 331-0805, Japan
- 4 Department of Internal Medicine, Social Insurance Omiya General Hospital,  
453 Bonsai, Kita, Saitama, 331-0805, Japan

**Key words:** serum amylase, NAFLD, metabolic syndrome, diabetes

**Word count:** 2,779 words

**ABSTRACT**

**Objectives:** Low serum amylase (LSA) was reported to be associated with obesity, metabolic syndrome (MetS), and diabetes. However, it is unknown whether LSA is associated with non-alcoholic fatty liver disease (NAFLD), a hepatic manifestation of MetS and insulin resistance. Therefore, we performed a clinical epidemiological study to investigate this potential association.

**Design:** A cross-sectional observational study with multivariate analysis.

**Setting:** Subjects were recruited in a healthcare centre in Saitama, an eastern district of Japan, near Tokyo.

**Participants:** A total of 1,475 asymptomatic adults aged 30–79 years who underwent detailed medical check-ups and who regularly consumed small amounts of alcohol (< 20 g/day).

**Outcome measures:** Serum amylase, cardiometabolic risk factors, NAFLD determined by ultrasound, MetS determined by Adult Treatment Panel-III criteria, and diabetes were assessed.

**Results:** The prevalence of NAFLD increased significantly from 22.5% to 42.4% (all grades) and from 9.2% to 24.0% (moderate or severe grade) from the highest to the lowest quartile of serum amylase. Multiple logistic regression analysis showed that, compared with the highest quartile of serum amylase, the lowest quartile of serum amylase was significantly associated with any-grade NAFLD and with moderate to

1 severe NAFLD, even after adjusting for MetS or diabetes. The association between LSA  
2  
3  
4 and any-grade NAFLD disappeared after further adjustment for body mass index or  
5  
6  
7 waist circumference, whereas the association between LSA and moderate or severe  
8  
9  
10 NAFLD remained statistically significant [odds ratios (95% confidence interval), 2.01  
11  
12  
13 (1.07–3.78) and 2.06 (1.09–3.87), respectively, both  $P = 0.01$ ].  
14  
15

16 **Conclusions:** Our results suggest that LSA may be a valuable marker for moderate or  
17  
18  
19 severe NAFLD in asymptomatic adults independent of MetS, diabetes, and obesity.  
20

21  
22 These results warrant confirmation in further studies.  
23

24  
25 (275/300 words)  
26  
27  
28  
29  
30  
31  
32  
33  
34  
35  
36  
37  
38  
39  
40  
41  
42  
43  
44  
45  
46  
47  
48  
49  
50  
51  
52  
53  
54  
55  
56  
57  
58  
59  
60

## ARTICLE SUMMARY

### Article focus

- The clinical relevance of low serum amylase (LSA) is unclear, but it is putatively associated with obesity-related metabolic abnormalities.
- It is unknown whether LSA is associated with non-alcoholic fatty liver disease (NAFLD), a hepatic manifestation of cardiometabolic disease and insulin resistance.

### Key messages

- Our results suggest that LSA is associated with NAFLD independent of metabolic syndrome, diabetes, and obesity.
- LSA may be an independent marker for moderate or severe NAFLD.

### Strengths and limitations of this study

- A possible association between LSA and NAFLD was evaluated after fully adjusting for relevant confounding factors.
- NAFLD was diagnosed with ultrasound in this study. Other methods, such as computed tomography and magnetic resonance imaging, may provide more precise assessment of NAFLD.
- This was an observational study and the cause–effect relationship is unknown.

## INTRODUCTION

Abnormal serum amylase levels generally reflect overall dysfunction of the pancreas or salivary glands. Although the clinical relevance of elevated serum amylase levels has been extensively studied in relation to various conditions, including acute pancreatitis, pancreatic cancer, ectopic amylase-producing tumours, abdominal trauma, and kidney dysfunction [1-5], the clinical relevance of low serum amylase (LSA) has not been examined. LSA is conventionally considered as a crude marker for diffuse pancreas destruction secondary to pancreatic diseases, such as advanced chronic pancreatitis and cystic fibrosis [6,7]. LSA or low pancreatic amylase is also associated with insulin deficiency in patients with type 1 diabetes and in patients with longstanding type 2 diabetes [8-11]. In our recent community-based study, LSA, defined as a serum amylase concentration of < 60 IU/l, was observed in 25% of asymptomatic individuals [12]. LSA is also associated with metabolic syndrome (MetS), a cluster of cardiovascular risk factors, and diabetes [12,13]. However, obesity is thought to be the strongest predictor of LSA in the asymptomatic general population [12].

In the last two decades, there has been a marked increase in the prevalence of non-alcoholic fatty liver disease (NAFLD) worldwide, along with an obesity pandemic [14,15]. NAFLD often progresses to a more severe condition, non-alcoholic steatohepatitis (NASH), and increased hepatic fibrosis is a significant histological feature of advanced NASH. NAFLD is considered to be a hepatic manifestation of

1  
2 MetS and insulin resistance [14-18], which suggests that NAFLD consists of a wide  
3  
4 spectrum of cardiometabolic diseases. It is also possible that NAFLD may reflect more  
5  
6 pronounced insulin resistance compared with MetS in certain clinical settings, including  
7  
8 in individuals without diabetes or obesity [17,19,20]. In this context, we hypothesised  
9  
10 that LSA may be associated with NAFLD independently of MetS and type 2 diabetes.  
11  
12 The aim of this study was to test this hypothesis and to investigate the clinical relevance  
13  
14 of LSA, which is often observed in clinical practice. Therefore, we examined the  
15  
16 associations among serum amylase, cardiometabolic risk factors, NAFLD, hepatic  
17  
18 fibrosis, MetS, and diabetes in a cross-sectional study of asymptomatic adults.  
19  
20  
21  
22  
23  
24  
25  
26  
27  
28  
29  
30

## 31 **METHODS**

### 32 **Protocol and subjects**

33  
34 The present report represents a series of observational studies performed in  
35  
36 collaboration with Josai University, Sakado, Japan, and Social Insurance Omiya  
37  
38 General Hospital that have been conducted to elucidate the relationships between  
39  
40 lifestyle-related diseases and cardiometabolic risk factors. We recruited, at random,  
41  
42 asymptomatic subjects aged 30–79 years who underwent thorough annual medical  
43  
44 check-ups at the Social Insurance Omiya General Hospital, Saitama, Japan, between  
45  
46 April 2009 and March 2010. The protocol was approved by The Ethics Committee of  
47  
48 Josai University and the Council of the Hospital, and informed consent was obtained  
49  
50  
51  
52  
53  
54  
55  
56  
57  
58  
59  
60

1 from all participants.  
2  
3

4 Subjects with C-reactive protein  $\geq 10.0$  mg/l, estimated glomerular filtration rate  
5  
6 (eGFR)  $\leq 35$  ml/min/1.73 m<sup>2</sup>, serum amylase  $\leq 30$  IU/l or  $\geq 200$  IU/l, and those  
7  
8 suspected of having cancer were excluded from the study. Subjects who habitually  
9  
10 consumed alcohol  $\geq 20$  g per day were also excluded from the study. Subjects positive  
11  
12 for hepatic B virus surface antigen were also excluded. Hepatic C virus infection was  
13  
14 not measured in this study. We also excluded subjects with other active liver diseases  
15  
16 not examined, by excluded those with elevated serum liver enzyme levels  
17  
18 (approximately three times the upper limit of normal): alanine aminotransferase (ALT)  
19  
20  $\geq 150$  IU/ml, aspartate aminotransferase (AST)  $\geq 150$  IU/ml, or  $\gamma$ -glutamyltransferase  
21  
22 (GGT)  $\geq 150$  IU/ml. Consequently, a total of 1,475 individuals were included in this  
23  
24 study.  
25  
26  
27  
28  
29  
30  
31  
32  
33  
34  
35  
36  
37  
38

### 39 **Laboratory measurements**

40  
41  
42 Laboratory and anthropometric tests, and an abdominal ultrasound were performed in  
43  
44 the early morning after an overnight fast. Serum parameters were measured using an  
45  
46 AutoAnalyzer (Hitachi, Tokyo, Japan). The serum amylase level was measured using an  
47  
48 enzymatic method (L-type Amylase; Wako, Tokyo, Japan) with a detection limit of 1.7  
49  
50 IU/l, and a run-to-run coefficient of variation of  $< 5.0\%$ .  
51  
52  
53  
54

55  
56  
57 Abdominal ultrasound for the detection of fatty liver was carried out by  
58  
59  
60



1 echography specialists at the Social Insurance Omiya General Hospital. Fatty liver in  
2  
3  
4 the eligible subjects was defined as NAFLD because they consumed < 20 g of alcohol  
5  
6  
7 per day [14]. The severity of NAFLD was graded into three categories: mild NAFLD, a  
8  
9  
10 slight increase in liver echogenicity with normal visualisation of the diaphragm and the  
11  
12  
13 portal veins; moderate NAFLD, a moderate increase in liver echogenicity with slightly  
14  
15  
16 impaired visualisation of the diaphragm and the portal veins; and severe NAFLD, a  
17  
18  
19 substantial increase in liver echogenicity with poor or no visualisation of the diaphragm  
20  
21  
22 and the portal veins. Since it is possible that mild NAFLD could include a normal liver,  
23  
24  
25 we defined overt NAFLD as moderate or severe NAFLD. The following liver fibrosis  
26  
27  
28 scores, the AST/ALT ratio [21], FIB-4, and AST to platelet ratio index (APRI), were  
29  
30  
31 calculated in all patients, using previously published formulae:

32  
33  
34 
$$\text{FIB-4} = \text{age (years)} \times \text{AST/platelet count (10}^9\text{/l)} \times \text{ALT}^{1/2}$$
 [22];

35  
36  
37 
$$\text{APRI} = [(\text{AST/the upper limit of normal of AST} = 35) \times 100] / \text{platelet count (10}^9\text{/l)}$$
 [23].

38  
39 The diagnosis of MetS was based on the Adult Treatment Panel-III criteria [24] with  
40  
41  
42 the following cut-off limits: 1) systolic blood pressure  $\geq$  130 mmHg or diastolic blood  
43  
44  
45 pressure  $\geq$  85 mmHg; 2) triglyceride  $\geq$  150 mg/dl; 3) high-density  
46  
47  
48 lipoprotein-cholesterol < 40 mg/dl for men and < 50 mg/dl for women; 4) fasting  
49  
50  
51 plasma glucose  $\geq$  100 mg/dl; and 5) waist circumference  $\geq$  90 cm for men and  $\geq$  80 cm  
52  
53  
54 for women. Subjects meeting three or more of these criteria, including treatment for any  
55  
56  
57 of these disorders, were defined as having MetS. Diabetes was defined as fasting plasma  
58  
59  
60

1  
2 glucose  $\geq$  126 mg/dl or glycosylated haemoglobin (HbA1c)  $\geq$  6.5% (by the National  
3  
4 Glycoprotein Standardization Program (NGSP)) according to the American Diabetes  
5  
6 Association criteria [25], or treatment with oral hypoglycaemic drugs or insulin. HbA1c  
7  
8 (Japan Diabetes Society [JDS]) was converted to HbA1c (NGSP) units using the  
9  
10 officially certified formula: HbA1c (NGSP) (%) =  $1.02 \times \text{JDS} (\%) + 0.25\%$  [26].  
11  
12  
13  
14  
15

16 Since serum amylase can be affected by kidney function because of its excretion  
17  
18 by the kidney [4,5], eGFR was considered as a confounding factor and was calculated  
19  
20 using the following equation for Japanese subjects [27]:  $\text{eGFR} (\text{ml}/\text{min}/1.73 \text{ m}^2) = 194$   
21  
22  $\times \text{serum Cr}^{-1.094} \times \text{age}^{-0.287}$  (if female)  $\times 0.739$ . Here, Cr = serum creatinine  
23  
24  
25  
26  
27  
28 concentration (mg/dl).  
29  
30  
31  
32

### 33 **Statistical analysis**

34  
35  
36 Data are expressed as the mean  $\pm$  standard deviation (SD) or median (interquartile  
37  
38 range). Subjects were divided into quartiles according to serum amylase levels, where  
39  
40 Q1 is the highest quartile and Q4 is the lowest quartile. *P*-values for continuous  
41  
42 variables were determined using analysis of variance (ANOVA) or the Mann-Whitney  
43  
44 *U* test, and for categorical variables using the  $\chi^2$  test. Highly skewed values (ALT, AST,  
45  
46 GGT, APRI, and triglyceride) were log-transformed before analysis. Subjects were also  
47  
48 stratified into four groups according to the grade of NAFLD (i.e., normal, mild,  
49  
50 moderate, and severe NAFLD). Multivariate logistic regression models were used to  
51  
52  
53  
54  
55  
56  
57  
58  
59  
60

1  
2  
3  
4  
5  
6  
7  
8  
9  
10  
11  
12  
13  
14  
15  
16  
17  
18  
19  
20  
21  
22  
23  
24  
25  
26  
27  
28  
29  
30  
31  
32  
33  
34  
35  
36  
37  
38  
39  
40  
41  
42  
43  
44  
45  
46  
47  
48  
49  
50  
51  
52  
53  
54  
55  
56  
57  
58  
59  
60

examine the associations of quartiles (Q2–4) of serum amylase with any-grade NAFLD (NAFLD-AG), and with overt NAFLD relative to Q1, controlling for relevant confounding factors, including MetS, diabetes, and body mass index (BMI) or waist circumference (WC). To elucidate any association between LSA and NAFLD, we examined the associations between LSA and NAFLD-AG, and between LSA and overt NAFLD. This analysis yielded odds ratios (OR) and 95% confidential intervals (95% CI). Tests for linear trends (*P* for trend) were calculated by treating the quartiles as a continuous variable (i.e., 1–4), and the same model analysis was conducted. Statistical analyses were performed using SPSS software version 18.0 (SPSS-IBM, Chicago, IL, USA) and Statview version 5.0 (SAS Institute, Cary, NC, USA). Values of *P* < 0.05 were considered to be statistically significant.

## RESULTS

The clinical characteristics of the subjects according to the quartile of serum amylase are shown in Table 1. The mean and median values of most clinical parameters, including platelet count and eGFR, increased significantly with as serum amylase decreased, although there was a significant trend for subjects with lower amylase levels to be younger. No significant trend in HbA1c was observed against quartiles of serum amylase. The prevalence of NAFLD-AG and overt NAFLD increased significantly, from 22.5% to 42.4% and from 9.2% to 24%, respectively, from the highest (Q1) to the

1 lowest serum amylase quartile (Q4). Log-transformed serum ALT and GGT increased  
2  
3  
4 significantly, whereas the AST/ALT ratio, APRI, and FIB-4 decreased significantly with  
5  
6  
7 decreasing serum amylase quartile.  
8  
9

10 When subjects were stratified according to NAFLD grade, serum amylase decreased  
11  
12 significantly with advancing grade of NAFLD (Figure 1). When subjects were further  
13  
14 stratified according to sex, there was no significant difference between men and women.  
15  
16 However, when the subjects were stratified according to high or low BMI (Figure 2),  
17  
18 serum amylase levels were significantly lower in overweight/obese subjects (BMI  $\geq$   
19  
20 25.0 kg/m<sup>2</sup>, mean  $\pm$  SD BMI, 27.3  $\pm$  2.3 kg/m<sup>2</sup>, n = 1,121) than in lean subjects (BMI <  
21  
22 25.0 kg/m<sup>2</sup>, mean  $\pm$  SD BMI, 21.6  $\pm$  2.0 kg/m<sup>2</sup>, n = 354). Serum amylase levels in lean  
23  
24  
25 subjects decreased significantly with advancing grade of NAFLD, whereas those in  
26  
27  
28 obese subjects did not. Significant differences between lean and obese subjects were  
29  
30  
31 only observed only in subjects with a normal liver or mild NAFLD. We did not conduct  
32  
33  
34 an analysis by further stratification according to MetS or diabetes because of the small  
35  
36  
37 proportion of subjects (both, < 10%).  
38  
39  
40  
41  
42  
43  
44

45 Multiple logistic regression analysis showed that, compared with the highest  
46  
47 quartile of serum amylase ( $\geq$  90 IU/l, Q1), the lowest quartile (< 60 IU/l, Q4) was  
48  
49 significantly associated with NAFLD-AG even after adjusting for confounders plus  
50  
51  
52 MetS or diabetes (Table 2, Models 4 and 5). In these conditions, MetS (OR: 3.66, 95%  
53  
54  
55 CI: 2.37–5.65) and diabetes (OR: 1.96, 95% CI: 1.25–3.05) were significantly  
56  
57  
58  
59  
60

1 associated with Q4 of serum amylase (data not shown). However, these associations  
2  
3 were markedly attenuated and were no longer statistically significant after adjusting for  
4  
5 clinical confounders plus BMI or WC (Models 6 and 7), although there was a trend  
6  
7 towards an association among the quartiles of serum amylase.  
8  
9

10  
11  
12  
13 When we excluded subjects with mild grade NAFLD (n = 242) and repeated the  
14  
15 analysis (Table 3), we detected stronger significant associations between Q4 and overt  
16  
17 NAFLD. These associations were also moderately attenuated after additional adjustment  
18  
19 for BMI or WC, but they remained statistically significant (Models 6 and 7). In this  
20  
21 condition, BMI (OR: 1.65, 95% CI: 1.51–1.80) and WC (OR: 1.21, 95% CI: 1.17–1.25)  
22  
23 were significantly associated with overt NAFLD (data not shown).  
24  
25  
26  
27  
28  
29  
30  
31  
32

### 33 **DISCUSSION**

34  
35  
36 For the last few decades, NAFLD has been considered as a manifestation of MetS and  
37  
38 insulin resistance [14-18]. In this context, the present study showed that LSA was  
39  
40 significantly associated with NAFLD-AG in asymptomatic adults, independent of MetS,  
41  
42 diabetes, and sex. Furthermore, LSA may be indicative of overt NAFLD, i.e., moderate  
43  
44 or severe NAFLD, independent of obesity. These findings are not inconsistent because  
45  
46 NAFLD may reflect insulin resistance, more so than MetS, in individuals without  
47  
48 diabetes or obesity [17,19,20].  
49  
50  
51  
52  
53  
54  
55

56  
57 This study provided evidence that NAFLD can occur in lean individuals, who  
58  
59  
60

1 accounted for 37.8% (62/104) of subjects with moderate NAFLD and 19.3% (11/57) of  
2  
3  
4 subjects with severe NAFLD (Figure 2). This is consistent with the results of  
5  
6  
7 multivariate logistic analysis, where there was a significant trend for NAFLD against  
8  
9  
10 quartiles of serum amylase, and the significant association between the lowest quartile  
11  
12  
13 of serum amylase and NAFLD remained after adjusting for BMI and WC (Tables 2 and  
14  
15  
16 3). Notably, we found no significant difference in serum amylase between lean and  
17  
18  
19 obese subjects with overt NAFLD, suggesting that the effects of obesity on serum  
20  
21  
22 amylase are apparent in subjects with a normal liver or with mild NAFLD, but not in  
23  
24  
25 subjects with overt NAFLD. Several studies have shown that NAFLD occurs in  
26  
27  
28 non-obese people, although the prevalence of NAFLD in non-obese subjects is lower  
29  
30  
31 than that in obese subjects [19,20,28]. Therefore, other than obesity, factors not  
32  
33  
34 examined in this study might also explain the association between LSA and NAFLD.  
35  
36  
37 Insulin resistance and obesity-related hormones, such as leptin, may be potential factors,  
38  
39  
40 because insulin resistance and energy imbalance are common pathophysiological  
41  
42  
43 findings in obese individuals [17,29]. Indeed, obesity plus insulin resistance is more  
44  
45  
46 closely associated with metabolic abnormalities and NAFLD than is obesity without  
47  
48  
49 insulin resistance [17]. Hyperinsulinaemia caused by insulin resistance stimulates *de*  
50  
51  
52 *novo* lipogenesis in the liver through sterol regulatory element binding protein-1c  
53  
54  
55 (SREBP-1c) [30], irrespective of the influx of fatty acid from a meal and lipolysis in  
56  
57  
58 adipose tissues. Additionally, we recently reported a latent association between LSA and  
59  
60

1  
2 insulin resistance in a small study of asymptomatic middle-aged adults [31], supporting  
3  
4 the hypothesis that LSA may be associated with NAFLD, at least in part through insulin  
5  
6 resistance. However, further large epidemiological studies evaluating insulin resistance  
7  
8  
9  
10 are needed to confirm our hypothesis.  
11

12  
13 As another explanation, systemic ectopic fat deposition in organs including the  
14  
15 pancreas (i.e., fatty pancreas) might contribute to the observed associations because  
16  
17 intrapancreatic fat, particularly intralobular pancreatic fat, was reported to be associated  
18  
19 with NAFLD and MetS [32,33]. An animal study showed that obese mice had a heavier  
20  
21 pancreas and more intrapancreatic fat [34]. Therefore, systemic fat deposits in multiple  
22  
23 organs may be a common cause underlying the association between NAFLD and overall  
24  
25 pancreatic dysfunction, which may result in impaired exocrine function, characterised as  
26  
27 LSA. Gene polymorphisms of patatin-like phospholipase domain containing 3  
28  
29 (PNPLA3) may also contribute to the strength of these associations. For example, a  
30  
31 common variant of the PNPLA3 gene (rs738409) was reported to be associated with  
32  
33 increased hepatic fat content (i.e., NAFLD) [35]. In the mouse liver,  
34  
35 adiponutrin/PNPLA3 gene expression is under the direct transcriptional control of  
36  
37 SREBP-1c, in response to insulin [36]  
38  
39  
40  
41  
42  
43  
44  
45  
46  
47  
48  
49  
50

51 Similar to an earlier study [12], HbA1c was not associated with LSA, probably  
52  
53 because most subjects in the lowest quartile of serum amylase in this study had no or  
54  
55 only mild insulin resistance or mild hyperinsulinaemia, which is likely compensated for  
56  
57  
58  
59  
60

1 and results in euglycaemia. In such conditions, fasting plasma glucose would increase  
2  
3  
4 linearly, as observed in Table 1, in response to insulin resistance, particularly in the  
5  
6  
7 early stage of diabetes [37,38].  
8  
9

10 To date, some markers have been considered for screening for NAFLD and mild  
11  
12 hepatic fibrosis [39-41]. In this study, the AST/ALT ratio decreased significantly with  
13  
14 the decreasing quartile of serum amylase. However, while the platelet count increased  
15  
16 significantly, both APRI and Fib-4 decreased (Table 1). Consequently, hepatic fibrosis is  
17  
18 unlikely to be associated with NAFLD in this study. A plausible explanation is that this  
19  
20 study mostly consisted of non-obese individuals, with a small proportion having MetS  
21  
22 and diabetes, resulting in a lower likelihood of advanced hepatic fibrosis and NASH. In  
23  
24 addition, more than half of the subjects in this study had repeatedly undergone medical  
25  
26 check-ups, which may promote consciousness of healthcare and favourable lifestyles.  
27  
28  
29  
30  
31  
32  
33  
34  
35  
36  
37  
38

### 39 **Limitations**

40  
41 Several limitations should be mentioned. First, NAFLD was diagnosed by ultrasound  
42  
43 rather than by histological examination, the gold standard technique for the diagnosis of  
44  
45 NAFLD. Thus, NAFLD and the degree of hepatic fibrosis could be inaccurately  
46  
47 evaluated, particularly in the early stages. Nevertheless, the ultrasound method is  
48  
49 effective for screening NAFLD, with an overall sensitivity of 89% and specificity of  
50  
51 93% [42]. Despite this, in cases of mild NAFLD with a small amount of fat (< 30%),  
52  
53  
54  
55  
56  
57  
58  
59  
60



1 the sensitivity is reduced. For this reason, we examined the association of LSA with  
2  
3  
4 NAFLD-AG and with overt NAFLD. Second, hepatitis C virus infection was not  
5  
6  
7 measured in this study. However, the prevalence of hepatitis C infection was reported to  
8  
9  
10 be 0.49–0.98% in Japanese blood donors [43,44]. Therefore, hepatitis C infection is  
11  
12  
13 unlikely to profoundly modify the association between LSA and NAFLD, although  
14  
15  
16 hepatitis C infection can contribute to the development of NAFLD [45]. Third, because  
17  
18  
19 of the cross-sectional nature of the study, we could not determine the cause–effect  
20  
21  
22 relationship between LSA and NAFLD. However, in a previous retrospective study [12],  
23  
24  
25 subjects with LSA at baseline were more likely to develop MetS-related metabolic  
26  
27  
28 abnormalities 5 years later. A longitudinal prospective study or a clinical intervention  
29  
30  
31 trial will be needed to elucidate the causality of the associations reported here.  
32  
33  
34  
35

## 36 **Conclusion**

37  
38  
39 Our results suggest that LSA may be associated with NAFLD, particularly moderate or  
40  
41  
42 severe NAFLD, in asymptomatic adults. This association was independent of MetS,  
43  
44  
45 diabetes, and obesity. Further studies are needed to confirm the observed associations,  
46  
47  
48 and to explore the clinical relevance of LSA.  
49  
50  
51  
52  
53

54 **Acknowledgments** None  
55  
56  
57  
58  
59  
60

1                   **Competing interests** The authors declare that they have no competing interests.  
2  
3

4                   **Funding**  
5

6  
7                   This research received no specific grant from any funding agency in the public,  
8  
9  
10                  commercial, or not-for-profit sectors.  
11  
12

13  
14  
15                  **Contributors**  
16

17  
18                  KN, HM, and MK designed the collaborative project; KN, HO, TM, and HF collected  
19  
20                  and analysed the data; KN, HO, MS, and YH researched and evaluated the literature;  
21  
22                  and KN wrote the first draft of the manuscript. All authors reviewed and edited the  
23  
24  
25                  manuscript, and approved the final version of the manuscript.  
26  
27  
28  
29

30  
31  
32                  **Data sharing statement** There are no additional data available.  
33  
34  
35  
36  
37  
38  
39  
40  
41  
42  
43  
44  
45  
46  
47  
48  
49  
50  
51  
52  
53  
54  
55  
56  
57  
58  
59  
60

**REFERENCES**

1. Yegneswaran B, Pitchumoni CS. Yegneswaran B, et al. When should serum amylase and lipase levels be repeated in a patient with acute pancreatitis? *Cleve Clin J Med* 2010;77:230-231.
2. Skrha J, Stěpán J. Clinical significance of amylase isoenzyme determination. *Acta Univ Carol Med Monogr* 1987;120:1-81.
3. Pieper-Bigelow C, Strocchi A, Levitt MD. Where does serum amylase come from and where does it go? *Gastroenterol Clin North Am* 1990;19:793-810.
4. Junge W, Mályusz M, Ehrens HJ. The role of the kidney in the elimination of pancreatic lipase and amylase from blood. *J Clin Chem Clin Biochem* 1985;23:387-392.
5. Collen MJ, Ansher AF, Chapman AB, et al. Serum amylase in patients with renal insufficiency and renal failure. *Am J Gastroenterol* 1990;85:1377-1380.
6. Domínguez-Muñoz JE, Pieramico O, Büchler M, et al. Ratios of different serum pancreatic enzymes in the diagnosis and staging of chronic pancreatitis. *Digestion* 1993;54:231-236.
7. Wolf RO, Hubbard VS, Gillard BK, et al. Three methods compared for determination of pancreatic and salivary amylase activity in serum of cystic fibrosis patients. *Clin Chem*. 1986;32:296-300.
8. Frier BM, Faber OK, Binder C, et al. The effect of residual insulin secretion on

- 1  
2 exocrine pancreatic function in juvenile-onset diabetes mellitus. *Diabetologia*  
3  
4  
5 1978;14:301-304.  
6  
7  
8 9. Dandona P, Freedman DB, Foo Y, et al. Exocrine pancreatic function in diabetes  
9  
10 mellitus. *J Clin Pathol* 1984;37:302-306  
11  
12  
13 10. Swislocki A, Noth R, Hallstone A, et al. Secretin-stimulated amylase release into  
14  
15 blood is impaired in type 1 diabetes mellitus. *Horm Metab Res* 2005;37:326-330.  
16  
17  
18 11. Aughsteen AA, Abu-Umair MS, Mahmoud SA. Biochemical analysis of serum  
19  
20 pancreatic amylase and lipase enzymes in patients with type 1 and type 2 diabetes  
21  
22 mellitus. *Saudi Med J* 2005;26:73-77.  
23  
24  
25  
26  
27 12. Nakajima K, Nemoto T, Muneyuki T, et al. Low serum amylase in association with  
28  
29 metabolic syndrome and diabetes: A community-based study. *Cardiovasc Diabetol.*  
30  
31  
32 2011;10:34.  
33  
34  
35  
36 13. Lee JG, Park SW, Cho BM, et al. Serum amylase and risk of the metabolic  
37  
38 syndrome in Korean adults. *Clin Chim Acta.* 2011; 412:1848-53  
39  
40  
41  
42 14. Neuschwander-Tetri BA, Caldwell SH. Nonalcoholic steatohepatitis: summary of  
43  
44 an AASLD Single Topic Conference. *Hepatology.* 2003;37:1202-1219.  
45  
46  
47  
48 15. Smith BW, Adams LA. Non-alcoholic fatty liver disease. *Crit Rev Clin Lab Sci.*  
49  
50 2011;48:97-113.  
51  
52  
53  
54 16. Stefan N, Häring HU. The metabolically benign and malignant fatty liver. *Diabetes.*  
55  
56 2011;60:2011-2017.  
57  
58  
59  
60

- 1  
2  
3  
4  
5  
6  
7  
8  
9  
10  
11  
12  
13  
14  
15  
16  
17  
18  
19  
20  
21  
22  
23  
24  
25  
26  
27  
28  
29  
30  
31  
32  
33  
34  
35  
36  
37  
38  
39  
40  
41  
42  
43  
44  
45  
46  
47  
48  
49  
50  
51  
52  
53  
54  
55  
56  
57  
58  
59  
60
17. Stefan N, Kantartzis K, Machann J, et al. Identification and characterization of metabolically benign obesity in humans. *Arch Intern Med.* 2008;168:1609-1616.
  18. Angelico F, Del Ben M, Conti R, et al. Insulin resistance, the metabolic syndrome, and nonalcoholic fatty liver disease. *J Clin Endocrinol Metab.* 2005; 90:1578-1582.
  19. Kim HJ, Kim HJ, Lee KE, et al. Metabolic significance of nonalcoholic fatty liver disease in nonobese, nondiabetic adults. *Arch Intern Med.* 2004;164:2169-7215.
  20. Musso G, Gambino R, Bo S, et al. Should nonalcoholic fatty liver disease be included in the definition of metabolic syndrome? A cross-sectional comparison with Adult Treatment Panel III criteria in nonobese nondiabetic subjects. *Diabetes Care.* 2008;31:562-568
  21. Iacobellis A, Marcellini M, Andriulli A, et al. Non invasive evaluation of liver fibrosis in paediatric patients with nonalcoholic steatohepatitis. *World J Gastroenterol.* 2006;12:7821-7825.
  22. Vallet-Pichard A, Mallet V, Nalpas B, et al. FIB-4: an inexpensive and accurate marker of fibrosis in HCV infection. *Hepatology.* 2007;46:32-36.
  23. Fibrosis score Wai CT, Greenson JK, Fontana RJ, et al. A simple noninvasive index can predict both significant fibrosis and cirrhosis in patients with chronic hepatitis C. *Hepatology* 2003; 38:518–526.
  24. Grundy SM, Cleeman JI, Daniels SR, et al. Diagnosis and management of the metabolic syndrome: an American Heart Association/National Heart, Lung, and

- 1 Blood Institute Scientific Statement. *Circulation*. 2005;112:2735-2752.
- 2
- 3
- 4 25. American Diabetes Association. Diagnosis and classification of diabetes mellitus.
- 5
- 6
- 7 Diabetes Care. 2010; 33 Suppl 1:S62-69.
- 8
- 9
- 10 26. Kashiwagi A, Kasuga M, Araki E, et al. International clinical harmonization of
- 11
- 12 glycated hemoglobin in Japan: From Japan Diabetes Society to National
- 13
- 14 Glycohemoglobin Standardization Program values. *Journal of Diabetes*
- 15
- 16 Investigation 2012;3:39-40
- 17
- 18
- 19
- 20
- 21
- 22 27. Matsuo S, Imai E, Horio M, et al. Revised equations for estimated GFR from serum
- 23
- 24 creatinine in Japan. *Am J Kidney Dis*. 2009;53:982–992.
- 25
- 26
- 27
- 28 28. Das K, Das K, Mukherjee PS, et al. Nonobese population in a developing country
- 29
- 30 has a high prevalence of nonalcoholic fatty liver and significant liver disease.
- 31
- 32
- 33 Hepatology. 2010;51:1593-1602.
- 34
- 35
- 36
- 37 29. Gautron L, Elmquist JK. Sixteen years and counting: an update on leptin in energy
- 38
- 39 balance. *J Clin Invest*. 2011;121:2087-2093.
- 40
- 41
- 42 30. Dentin R, Pégrier JP, Benhamed F, et al. Hepatic glucokinase is required for the
- 43
- 44 synergistic action of ChREBP and SREBP-1c on glycolytic and lipogenic gene
- 45
- 46 expression. *J Biol Chem*. 2004;279:20314-20326.
- 47
- 48
- 49
- 50
- 51 31. Muneyuki T, Nakajima K, Aoki A, et al. Latent associations of low serum amylase
- 52
- 53
- 54 with decreased plasma insulin levels and insulin resistance in asymptomatic
- 55
- 56 middle-aged adults. *Cardiovasc Diabetol*. 2012; 11:80.
- 57
- 58
- 59
- 60

- 1  
2  
3  
4  
5  
6  
7  
8  
9  
10  
11  
12  
13  
14  
15  
16  
17  
18  
19  
20  
21  
22  
23  
24  
25  
26  
27  
28  
29  
30  
31  
32  
33  
34  
35  
36  
37  
38  
39  
40  
41  
42  
43  
44  
45  
46  
47  
48  
49  
50  
51  
52  
53  
54  
55  
56  
57  
58  
59  
60
32. van Geenen EJ, Smits MM, Schreuder TC, et al. Nonalcoholic fatty liver disease is related to nonalcoholic fatty pancreas disease. *Pancreas*. 2010;39:1185-1190.
  33. Sepe PS, Ohri A, Sanaka S, et al. A prospective evaluation of fatty pancreas by using EUS. *Gastrointest Endosc*. 201; 73:987-993.
  34. Mathur A, Marine M, Lu D, et al. Nonalcoholic fatty pancreas disease. *HPB (Oxford)*. 2007;9:312-318.
  35. Sookoian S, Pirola CJ. Meta-analysis of the influence of I148M variant of patatin-like phospholipase domain containing 3 gene (PNPLA3) on the susceptibility and histological severity of nonalcoholic fatty liver disease. *Hepatology*. 2011;53:1883-1894.
  36. Dubuquoy C, Robichon C, Lasnier F, et al. Distinct regulation of adiponutrin/PNPLA3 gene expression by the transcription factors ChREBP and SREBP1c in mouse and human hepatocytes. *J Hepatol*. 2011;55:145-153.
  37. Reaven G. Wanted!: a standardized measurement of plasma insulin concentration. *Arterioscler Thromb Vasc Biol*. 2011; 31:954-955.
  38. Robins SJ, Lyass A, Zachariah JP, et al. Insulin resistance and the relationship of a dyslipidemia to coronary heart disease: the Framingham Heart Study. *Arterioscler Thromb Vasc Biol*. 2011;31:1208-1214.
  39. Williams AL, Hoofnagle JH. Ratio of serum aspartate to alanine aminotransferase in chronic hepatitis. Relationship to cirrhosis. *Gastroenterology*. 1988; 95(3):734-9.

- 1  
2  
3  
4  
5  
6  
7  
8  
9  
10  
11  
12  
13  
14  
15  
16  
17  
18  
19  
20  
21  
22  
23  
24  
25  
26  
27  
28  
29  
30  
31  
32  
33  
34  
35  
36  
37  
38  
39  
40  
41  
42  
43  
44  
45  
46  
47  
48  
49  
50  
51  
52  
53  
54  
55  
56  
57  
58  
59  
60
40. Angulo P, Hui JM, Marchesini G, et al. The NAFLD fibrosis score: a noninvasive system that identifies liver fibrosis in patients with NAFLD. *Hepatology*. 2007;45:846-854.
41. McPherson S, Stewart SF, Henderson E, et al. Simple non-invasive fibrosis scoring systems can reliably exclude advanced fibrosis in patients with non-alcoholic fatty liver disease. *Gut*. 2010;59:1265-1269.
42. Joseph AE, Saverymuttu SH, al-Sam S, et al. Comparison of liver histology with ultrasonography in assessing diffuse parenchymal liver disease. *Clin Radiol*. 1991;43:26-31.
43. Yamaguchi K, Kiyokawa H, Machida J, Obayashi A, Nojiri N, Ueda S, Takatsuki K. Seroepidemiology of hepatitis C virus infection in Japan and HCV infection in haemodialysis patients. *FEMS Microbiol Rev*. 1994 Jul;14(3):253-8.
44. Tanaka J, Kumagai J, Katayama K, Komiya Y, Mizui M, Yamanaka R, Suzuki K, Miyakawa Y, Yoshizawa H. Sex- and age-specific carriers of hepatitis B and C viruses in Japan estimated by the prevalence in the 3,485,648 first-time blood donors during 1995-2000. *Intervirology*. 2004;47(1):32-40.
45. Pattullo V, Douglas MW, George J. Organelle dysfunction in hepatitis C virus-associated steatosis: anything to learn from nonalcoholic steatohepatitis? *Expert Rev Gastroenterol Hepatol*. 2011 Apr;5(2):265-77.



## Figure Legends

**Figure 1** Serum amylase levels according to the grade of NAFLD and sex. Serum amylase levels decreased significantly with advancing grade of NAFLD in both sexes (ANOVA, both  $P = 0.0001$ ). There was no significant difference between men and women (two-way ANOVA,  $P = 0.45$ ). \*Number of subjects in each group. Bars represent standard errors.

**Figure 2** Serum amylase levels according to the grade of NAFLD and obesity. Obesity was defined as  $BMI \geq 25.0 \text{ kg/m}^2$ . Serum amylase levels decreased significantly with advancing grade of NAFLD in lean subjects (ANOVA,  $P = 0.01$ ), but not in obese subjects ( $P = 0.33$ ). An overall significant difference was observed between lean and obese subjects (two-way ANOVA,  $P = 0.03$ ). \*Number of subjects in each group; † $P = 0.0001$  and ‡ $P = 0.02$  for lean versus obese subjects (Mann–Whitney  $U$  test). Bars represent standard errors.

Table 1. Characteristics of subjects stratified according to quartiles of serum amylase

|                                    | Total            | Q1 (Highest)     | Q2               | Q3               | Q4 (Lowest)      | <i>P</i> value |
|------------------------------------|------------------|------------------|------------------|------------------|------------------|----------------|
| n                                  | 1,475            | 369              | 371              | 381              | 354              |                |
| Age, y                             | 55.1 ± 12.2      | 58.4 ± 11.8      | 56.4 ± 12.2      | 52.9 ± 11.7      | 52.7 ± 12.0      | < 0.0001       |
| Men, n (%)                         | 747 (50.6)       | 178 (48.2)       | 176 (47.4)       | 205 (53.8)       | 188 (53.1)       | 0.19           |
| BMI, kg/m <sup>2</sup>             | 23.0 ± 3.2       | 21.9 ± 2.7       | 22.6 ± 3.2       | 23.3 ± 3.1       | 24.1 ± 3.4       | < 0.0001       |
| WC, cm                             | 80.8 ± 8.9       | 78.2 ± 8.3       | 79.9 ± 8.8       | 81.8 ± 8.8       | 83.2 ± 9.1       | < 0.0001       |
| Systolic blood pressure, mmHg      | 120 ± 18.9       | 119 ± 18.5       | 119 ± 18.7       | 120 ± 18.9       | 123 ± 19.1       | 0.007          |
| Diastolic blood pressure, mmHg     | 74.1 ± 12.6      | 72.6 ± 12.2      | 73.1 ± 11.9      | 74.5 ± 13.4      | 76.1 ± 12.4      | 0.0009         |
| Platelet count, 10 <sup>9</sup> /L | 235 ± 53.4       | 228 ± 53.8       | 235 ± 53.1       | 237 ± 51.1       | 241 ± 55.2       | 0.01           |
| ALT, IU/l                          | 18 (14–25)       | 18 (14–23)       | 17 (14–23)       | 18 (14–25)       | 19 (14–29)       | < 0.0001       |
| AST, IU/l                          | 20 (17–24)       | 21 (19–25)       | 20 (17–24)       | 19 (17–23)       | 20 (17–24)       | 0.04           |
| AST/ALT                            | 1.15 ± 0.36      | 1.24 ± 0.35      | 1.20 ± 0.37      | 1.12 ± 0.33      | 1.04 ± 0.35      | < 0.0001       |
| APRI                               | 0.25 (0.20–0.33) | 0.28 (0.22–0.34) | 0.25 (0.21–0.33) | 0.24 (0.20–0.30) | 0.24 (0.19–0.32) | 0.0006         |
| FIB-4                              | 1.13 (0.82–1.52) | 1.33 (0.98–1.76) | 1.20 (0.89–1.59) | 1.05 (0.76–1.38) | 0.98 (0.70–1.36) | < 0.0001       |
| GGT, IU/l                          | 22 (16–33)       | 20 (15–31)       | 20 (16–30)       | 23 (16–34)       | 24 (17–38)       | 0.0009         |
| C-reactive protein                 | 0.4 (0.3–0.8)    | 0.3 (0.3–0.63)   | 0.4 (0.3–0.8)    | 0.4 (0.3–0.8)    | 0.5 (0.3–1.1)    | < 0.0001       |
| Amylase, IU/l                      | 77.3 ± 24.9      | 110 ± 22.0       | 81.3 ± 4.7       | 66.6 ± 4.1       | 50.3 ± 7.0       | —              |
| (range)                            | (30–200)         | (90–200)         | (74–89)          | (60–73)          | (30–59)          |                |
| Triglyceride, mg/dl                | 88 (64–128)      | 83 (63–121)      | 84 (62–123)      | 88 (65–128)      | 100 (65–143)     | 0.001          |
| HDL-cholesterol, mg/dl             | 61.2 ± 15.0      | 64.2 ± 15.4      | 62.6 ± 14.8      | 59.8 ± 14.6      | 58.3 ± 14.5      | < 0.0001       |
| Fasting plasma glucose, mg/dl      | 99.6 ± 16.7      | 97.5 ± 13.4      | 97.4 ± 11.4      | 101 ± 19.4       | 103 ± 20.4       | < 0.0001       |
| HbA1c (NGSP), %                    | 5.7 ± 0.6        | 5.7 ± 0.5        | 5.7 ± 0.4        | 5.7 ± 0.6        | 5.8 ± 0.7        | 0.14           |
| eGFR, ml/min/1.73m <sup>2</sup>    | 75.0 ± 13.9      | 71.0 ± 14.3      | 74.3 ± 12.9      | 76.0 ± 14.2      | 78.7 ± 13.1      | < 0.0001       |
| ATP-III-Metabolic syndrome, n (%)  | 139 (9.4)        | 16 (4.3)         | 23 (6.2)         | 47 (12.3)        | 53 (15.0)        | < 0.0001       |
| Diabetes, n (%)                    | 114 (7.7)        | 19 (5.1)         | 17 (4.6)         | 34 (8.9)         | 44 (12.4)        | 0.0002         |

|                                   |            |            |            |            |            |          |
|-----------------------------------|------------|------------|------------|------------|------------|----------|
| NAFLD of all grades, n (%)        | 463 (31.4) | 83 (22.5)  | 97 (26.1)  | 133 (34.9) | 150 (42.4) | < 0.0001 |
| Moderate to severe NAFLD, n (%)   | 221 (15.0) | 34 (9.2)   | 42 (11.3)  | 60 (15.7)  | 85 (24.0)  | < 0.0001 |
| Medical history of                |            |            |            |            |            |          |
| Cardiovascular diseases, n (%)    | 55 (3.7)   | 11 (3.0)   | 20 (5.4)   | 11 (2.9)   | 13 (3.7)   | 0.24     |
| Stroke, n (%)                     | 26 (1.8)   | 12 (3.3)   | 6 (1.6)    | 4 (1.1)    | 4 (1.1)    | 0.08     |
| Medications for                   |            |            |            |            |            |          |
| Hypertension, n (%)               | 237 (16.1) | 64 (17.3)  | 47 (12.7)  | 67 (17.6)  | 59 (16.7)  | 0.22     |
| Hypercholesterolemia, n (%)       | 177 (12.0) | 56 (15.2)  | 43 (11.6)  | 34 (8.9)   | 44 (12.4)  | 0.07     |
| Diabetes, n (%)                   | 56 (3.8)   | 12 (3.3)   | 12 (3.2)   | 15 (3.9)   | 17 (4.8)   | 0.65     |
| Current smoker, n (%)             | 273 (18.5) | 40 (10.8)  | 50 (13.5)  | 86 (22.6)  | 97 (27.4)  | < 0.0001 |
| Everyday alcohol consumers, n (%) | 229 (15.5) | 51 (13.8)  | 59 (15.9)  | 66 (17.3)  | 53 (15.0)  | 0.61     |
| Regular exercise, n (%)           | 507 (34.4) | 144 (39.0) | 135 (36.4) | 125 (32.9) | 103 (29.1) | 0.03     |

Data are means  $\pm$ SD and medians (interquartile range). *P*-values for continuous variables and categorical variables were determined by analysis of variance and the  $\chi^2$  test, respectively. Regular exercise:  $\geq$  30 min exercise per session at least twice a week.

Table 2. Odds ratios for NAFLD-AG according to serum amylase quartiles

| Serum amylase quartiles | Q1 (Highest) | Q2               | Q3               | Q4 (Lowest)      | <i>P</i> for trend |
|-------------------------|--------------|------------------|------------------|------------------|--------------------|
| n                       | 369          | 371              | 381              | 354              |                    |
| Model 1                 | 1            | 1.22 (0.87–1.71) | 1.85 (1.34–2.55) | 2.53 (1.84–3.50) | < 0.0001           |
| Model 2                 | 1            | 1.28 (0.91–1.81) | 1.96 (1.39–2.74) | 2.74 (1.95–3.85) | < 0.0001           |
| Model 3                 | 1            | 1.35 (0.93–1.97) | 2.03 (1.41–2.94) | 2.41 (1.66–3.51) | < 0.0001           |
| Model 4                 | 1            | 1.25 (0.86–1.82) | 1.83 (1.26–2.65) | 2.18 (1.49–3.18) | < 0.0001           |
| Model 5                 | 1            | 1.31 (0.90–1.90) | 2.00 (1.39–2.89) | 2.36 (1.62–3.44) | < 0.0001           |
| Model 6                 | 1            | 0.99 (0.66–1.49) | 1.34 (0.89–2.01) | 1.42 (0.94–2.15) | 0.04               |
| Model 7                 | 1            | 1.02 (0.68–1.53) | 1.30 (0.87–1.94) | 1.49 (0.99–2.24) | 0.03               |

Model 1: unadjusted

Model 2: adjusted for age, sex, and current smoking (*versus* non-smokers)

Model 3: Model 2 plus adjustment for log-transformed ALT, regular exercise (*versus* infrequent exercise), daily alcohol consumption (*versus* infrequent/no alcohol consumption), eGFR, past history of heart diseases and stroke, and medications for hypertension, diabetes, and dyslipidemia.

Model 4: Model 3 plus adjustment for diabetes, but excluding medications for hypertension, diabetes, and dyslipidemia.

Model 5: Model 3 plus adjustment for metabolic syndrome, but excluding medications for hypertension, diabetes, and dyslipidemia.

Model 6: Model 3 plus adjustment for BMI

Model 7: Model 3 plus adjustment for WC

**Table 3. Odds ratios of each serum amylase for NAFLD of moderate or severe grade**

| Serum amylase quartiles | Q1 (Highest) | Q2               | Q3               | Q4 (Lowest)      | <i>P</i> for trend |
|-------------------------|--------------|------------------|------------------|------------------|--------------------|
| N*                      | 320          | 316              | 308              | 289              |                    |
| Model 1                 | 1            | 1.29 (0.80–2.09) | 2.04 (1.29–3.20) | 3.51 (2.27–5.42) | < 0.0001           |
| Model 2                 | 1            | 1.36 (0.83–2.22) | 2.14 (1.33–3.44) | 3.81 (2.40–6.05) | < 0.0001           |
| Model 3                 | 1            | 1.61 (0.91–2.86) | 2.32 (1.32–4.07) | 3.45 (1.99–6.00) | < 0.0001           |
| Model 4                 | 1            | 1.48 (0.84–2.64) | 2.11 (1.19–3.73) | 2.97 (1.70–5.20) | < 0.0001           |
| Model 5                 | 1            | 1.56 (0.89–2.75) | 2.32 (1.33–4.04) | 3.26 (1.88–5.66) | < 0.0001           |
| Model 6                 | 1            | 1.05 (0.54–2.03) | 1.44 (0.76–2.72) | 2.01 (1.07–3.78) | 0.01               |
| Model 7                 | 1            | 1.06 (0.55–2.05) | 1.37 (0.73–2.59) | 2.06 (1.09–3.87) | 0.01               |

\*Subjects with mild NAFLD (n = 242) were excluded from this analysis. Model 1 to Model 7 are the same as in **Table 2**.

1  
2  
3  
4  
5  
6  
7  
8  
9  
10  
11  
12  
13  
14  
15  
16  
17  
18  
19  
20  
21  
22  
23  
24  
25  
26  
27  
28  
29  
30  
31  
32  
33  
34  
35  
36  
37  
38  
39  
40  
41  
42  
43  
44  
45  
46  
47  
48  
49  
50  
51  
52  
53  
54  
55  
56  
57  
58  
59  
60

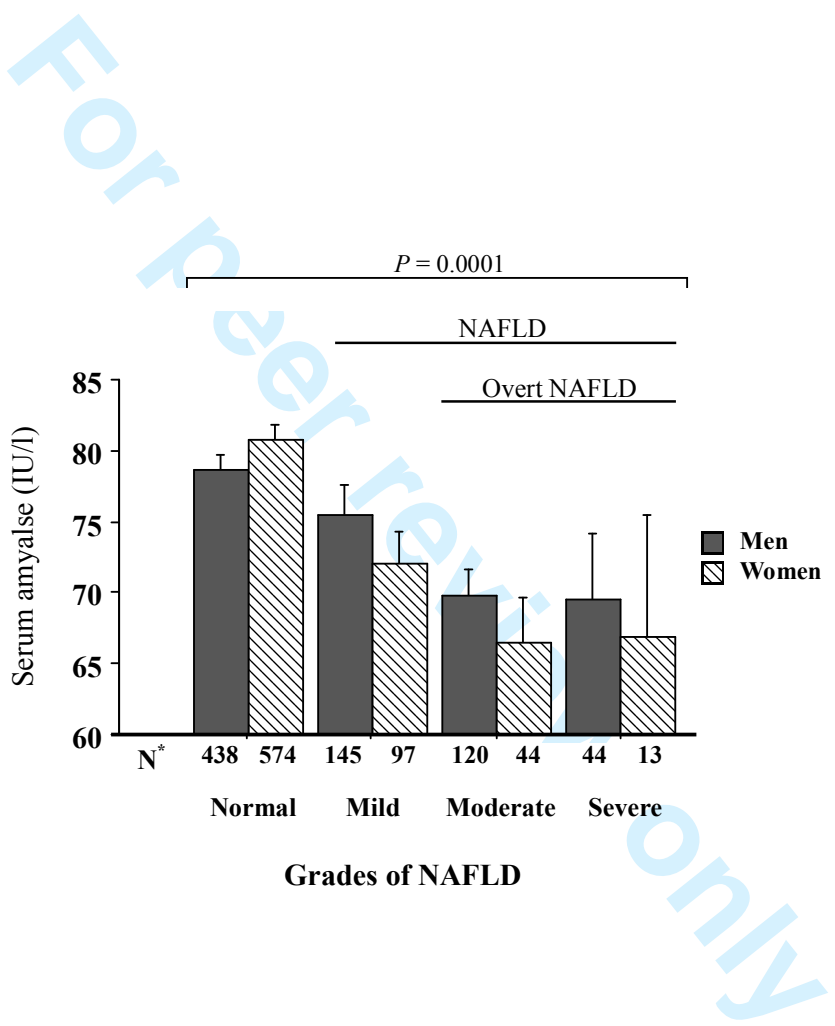

1  
2  
3  
4  
5  
6  
7  
8  
9  
10  
11  
12  
13  
14  
15  
16  
17  
18  
19  
20  
21  
22  
23  
24  
25  
26  
27  
28  
29  
30  
31  
32  
33  
34  
35  
36  
37  
38  
39  
40  
41  
42  
43  
44  
45  
46  
47  
48  
49  
50  
51  
52  
53  
54  
55  
56  
57  
58  
59  
60

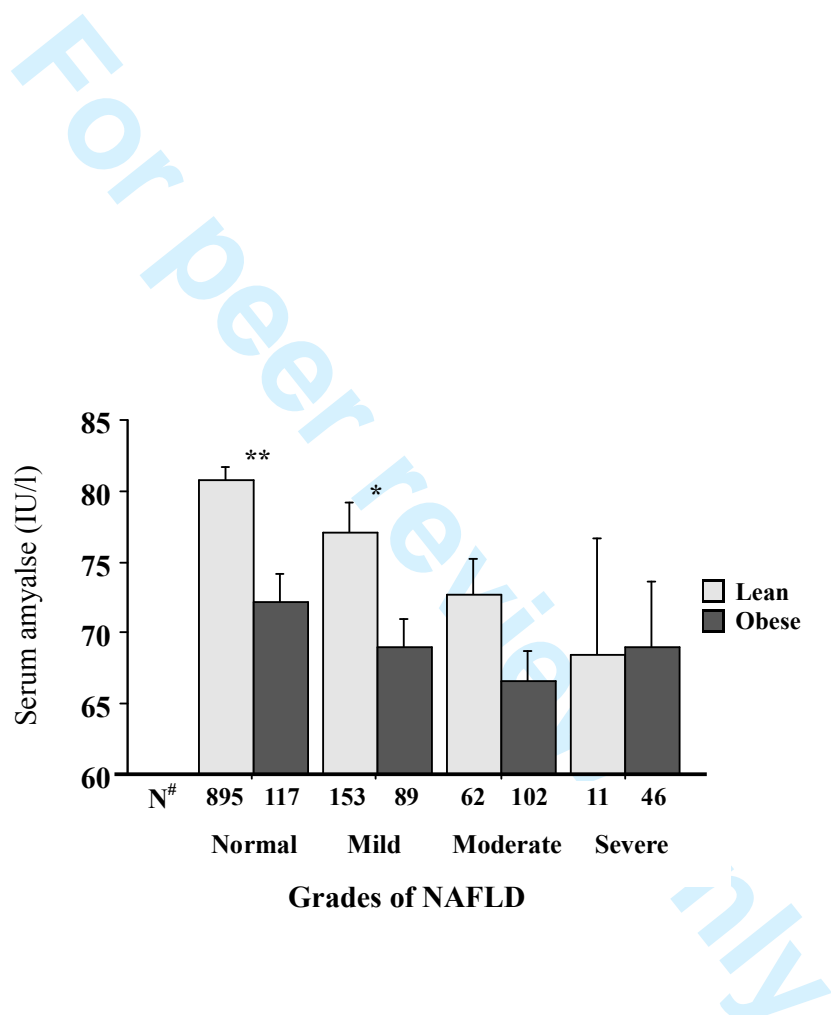



**Independent association between low serum amylase and non-alcoholic fatty liver disease in asymptomatic adults: A cross-sectional observational study**

|                                 |                                                                                                                                                                                                                                                                                                                                                                                                                                                                                                                                                                                                                                                                                                                                                                                                                                                           |
|---------------------------------|-----------------------------------------------------------------------------------------------------------------------------------------------------------------------------------------------------------------------------------------------------------------------------------------------------------------------------------------------------------------------------------------------------------------------------------------------------------------------------------------------------------------------------------------------------------------------------------------------------------------------------------------------------------------------------------------------------------------------------------------------------------------------------------------------------------------------------------------------------------|
| Journal:                        | <i>BMJ Open</i>                                                                                                                                                                                                                                                                                                                                                                                                                                                                                                                                                                                                                                                                                                                                                                                                                                           |
| Manuscript ID:                  | bmjopen-2012-002235.R1                                                                                                                                                                                                                                                                                                                                                                                                                                                                                                                                                                                                                                                                                                                                                                                                                                    |
| Article Type:                   | Research                                                                                                                                                                                                                                                                                                                                                                                                                                                                                                                                                                                                                                                                                                                                                                                                                                                  |
| Date Submitted by the Author:   | 11-Dec-2012                                                                                                                                                                                                                                                                                                                                                                                                                                                                                                                                                                                                                                                                                                                                                                                                                                               |
| Complete List of Authors:       | Nakajima, Kei; Josai University, Department of Medical Dietetics, Faculty of Pharmaceutical Sciences<br>Oshida, Haruki; Josai University, Department of Medical Dietetics, Faculty of Pharmaceutical Sciences<br>Muneyuki, Toshitaka; Jichi Medical University School of Medicine, First Department of Comprehensive Medicine<br>Saito, Masafumi; Josai University, Department of Medical Dietetics, Faculty of Pharmaceutical Sciences<br>Hori, Yumiko; Josai University, Department of Medical Dietetics, Faculty of Pharmaceutical Sciences<br>Fuchugami, Hiroshi; Social Insurance Omiya General Hospital, Department of Health Care Center<br>Takei, Masafumi; Jichi Medical University School of Medicine, First Department of Comprehensive Medicine<br>Munakata, Hiromi; Social Insurance Omiya General Hospital, Department of Internal Medicine |
| <b>Primary Subject Heading</b>: | Epidemiology                                                                                                                                                                                                                                                                                                                                                                                                                                                                                                                                                                                                                                                                                                                                                                                                                                              |
| Secondary Subject Heading:      | Gastroenterology and hepatology, Nutrition and metabolism, Diabetes and endocrinology                                                                                                                                                                                                                                                                                                                                                                                                                                                                                                                                                                                                                                                                                                                                                                     |
| Keywords:                       | Clinical Epidemiology, Cross sectional studies, Diabetes & endocrinology < INTERNAL MEDICINE, Gastroenterology < INTERNAL MEDICINE, Hepatology < INTERNAL MEDICINE                                                                                                                                                                                                                                                                                                                                                                                                                                                                                                                                                                                                                                                                                        |
|                                 |                                                                                                                                                                                                                                                                                                                                                                                                                                                                                                                                                                                                                                                                                                                                                                                                                                                           |

SCHOLARONE™  
Manuscripts



1  
2 **Independent association between low serum amylase and non-alcoholic fatty liver**  
3  
4 **disease in asymptomatic adults: A cross-sectional observational study**  
5  
6  
7  
8  
9

10 Short title: Low serum amylase and non-alcoholic fatty liver disease  
11  
12  
13

14  
15  
16 Kei Nakajima<sup>1,4\*</sup>, Haruki Oshida<sup>1</sup> Toshitaka Muneyuki,<sup>2</sup> Masafumi Saito,<sup>1</sup> Yumiko  
17  
18 Hori,<sup>1</sup> Hiroshi Fuchugami,<sup>3</sup> Masafumi Kakei<sup>2</sup>, Hiromi Munakata<sup>4</sup>  
19  
20  
21  
22  
23

24  
25 \*Correspondence to Kei Nakajima, M.D., Ph.D., Division of Clinical Nutrition,  
26

27 Department of Medical Dietetics, Faculty of Pharmaceutical Sciences, Josai University,  
28

29  
30 1-1 Keyakidai, Sakado, Saitama, 350-0295, Japan  
31

32  
33 email: [keinaka@josai.ac.jp](mailto:keinaka@josai.ac.jp); Tel: +81-49-271-7260; Fax: +81-49-271-7260  
34  
35  
36  
37  
38

39 1 Division of Clinical Nutrition, Department of Medical Dietetics, Faculty of  
40  
41 Pharmaceutical Sciences, Josai University, 1-1 Keyakidai, Sakado, Saitama 350-0295,  
42  
43  
44  
45 Japan  
46

47  
48 2 First Department of Comprehensive Medicine, Saitama Medical Center, Jichi Medical  
49  
50  
51 University School of Medicine, 1-847 Amanuma, Omiya, Saitama 330-8503, Japan  
52

53  
54 3 Department of Health Care Center, Social Insurance Omiya General Hospital, 453  
55  
56  
57 Bonsai, Kita, Saitama 331-0805, Japan  
58  
59  
60

1  
2 4 Department of Internal Medicine, Social Insurance Omiya General Hospital, 453  
3

4  
5 Bonsai, Kita, Saitama 331-0805, Japan  
6  
7  
8  
9

10 **Key words:** serum amylase, NAFLD, metabolic syndrome, diabetes  
11

12  
13 **Word count:** 3334 words  
14  
15  
16  
17  
18  
19  
20  
21  
22  
23  
24  
25  
26  
27  
28  
29  
30  
31  
32  
33  
34  
35  
36  
37  
38  
39  
40  
41  
42  
43  
44  
45  
46  
47  
48  
49  
50  
51  
52  
53  
54  
55  
56  
57  
58  
59  
60

For peer review only

**ABSTRACT**

**Objectives:** Low serum amylase (LSA) was reported to be associated with obesity, metabolic syndrome (MetS), and diabetes. However, it is unknown whether LSA is associated with non-alcoholic fatty liver disease (NAFLD), a hepatic manifestation of MetS and insulin resistance. Therefore, we performed a clinical epidemiological study to investigate this potential association.

**Design:** A cross-sectional observational study with multivariate analysis.

**Setting:** Subjects were recruited in a healthcare centre in Saitama, an eastern district of Japan, near Tokyo.

**Participants:** A total of 1,475 asymptomatic adults aged 30–79 years who underwent detailed medical check-ups and who regularly consumed small amounts of alcohol (< 20 g/day).

**Outcome measures:** Serum amylase, cardiometabolic risk factors, NAFLD determined by ultrasound, MetS determined by Adult Treatment Panel-III criteria, and diabetes were assessed.

**Results:** The prevalence of NAFLD increased significantly from 22.5% to 42.4% (all grades) and from 9.2% to 24.0% (moderate or severe grade) from the highest to the lowest quartile of serum amylase. Multiple logistic regression analysis showed that, compared with the highest quartile of serum amylase, the lowest quartile of serum amylase was significantly associated with any-grade NAFLD and with moderate to

1  
2 severe NAFLD, even after adjusting for MetS or diabetes. The association between LSA  
3  
4 and any-grade NAFLD disappeared after further adjustment for body mass index or  
5  
6 waist circumference, whereas the association between LSA and moderate or severe  
7  
8 NAFLD remained statistically significant [odds ratios (95% confidence interval), 2.01  
9  
10 (1.07–3.78) and 2.06 (1.09–3.87), respectively, both  $P = 0.01$ ].  
11  
12  
13  
14  
15

16 **Conclusions:** Our results suggest that LSA may be associated with moderate or severe  
17  
18 NAFLD in asymptomatic adults independent of MetS, diabetes, and obesity. These  
19  
20 results warrant confirmation in further studies.  
21  
22  
23

24 (274/300 words)  
25  
26  
27  
28  
29  
30  
31  
32  
33  
34  
35  
36  
37  
38  
39  
40  
41  
42  
43  
44  
45  
46  
47  
48  
49  
50  
51  
52  
53  
54  
55  
56  
57  
58  
59  
60

## ARTICLE SUMMARY

### Article focus

- The clinical relevance of low serum amylase (LSA) is unclear, but it is putatively associated with obesity-related metabolic abnormalities.
- It is unknown whether LSA is associated with non-alcoholic fatty liver disease (NAFLD), a hepatic manifestation of cardiometabolic disease and insulin resistance.

### Key messages

- Our results suggest that LSA is associated with NAFLD independent of metabolic syndrome, diabetes, and obesity.
- LSA may be an independent marker for moderate or severe NAFLD.

### Strengths and limitations of this study

- A possible association between LSA and NAFLD was evaluated after fully adjusting for relevant confounding factors.
- NAFLD was diagnosed with ultrasound in this study. Other methods, such as computed tomography, magnetic resonance imaging, and fibroscan, may provide more precise assessment of NAFLD.
- This was an observational study and the cause–effect relationship is unknown.

## INTRODUCTION

Abnormal serum amylase levels generally reflect overall dysfunction of the pancreas or salivary glands. Although the clinical relevance of elevated serum amylase levels has been extensively studied in relation to various conditions, including acute pancreatitis, pancreatic cancer, ectopic amylase-producing tumours, abdominal trauma, and kidney dysfunction [1-5], the clinical relevance of low serum amylase (LSA) has not been examined. LSA is conventionally considered as a crude marker for diffuse pancreas destruction secondary to pancreatic diseases, such as advanced chronic pancreatitis and cystic fibrosis [6,7]. LSA or low pancreatic amylase is also associated with insulin deficiency in patients with type 1 diabetes and in patients with longstanding type 2 diabetes [8-11]. In our recent community-based study, LSA, defined as a serum amylase concentration of < 60 IU/l, was observed in 25% of asymptomatic individuals [12]. LSA is also associated with metabolic syndrome (MetS), a cluster of cardiovascular risk factors, and diabetes [12,13]. However, obesity is thought to be the strongest predictor of LSA in the asymptomatic general population [12].

In the last two decades, there has been a marked increase in the prevalence of non-alcoholic fatty liver disease (NAFLD) worldwide, along with an obesity pandemic [14,15]. NAFLD often progresses to a more severe condition, non-alcoholic steatohepatitis (NASH), and increased hepatic fibrosis is a significant histological feature of advanced NASH. NAFLD is considered to be a hepatic manifestation of

1 MetS and insulin resistance [14-18], which suggests that NAFLD consists of a wide  
2  
3  
4 spectrum of cardiometabolic diseases. It is also possible that NAFLD may reflect more  
5  
6  
7 pronounced insulin resistance compared with MetS in certain clinical settings, including  
8  
9  
10 in individuals without diabetes or obesity [17,19,20]. In this context, we hypothesised  
11  
12  
13 that LSA may be associated with NAFLD independently of MetS, type 2 diabetes, and  
14  
15  
16 even obesity. The aim of this study was to test this hypothesis and to investigate the  
17  
18  
19 clinical relevance of LSA, which is often observed in clinical practice. Therefore, we  
20  
21  
22 examined the associations among serum amylase, cardiometabolic risk factors, NAFLD,  
23  
24  
25 hepatic fibrosis, MetS, and diabetes in a cross-sectional study of asymptomatic adults.  
26  
27  
28  
29  
30

## 31 **METHODS**

### 32 **Protocol and subjects**

33  
34 The present report represents a series of observational studies performed in  
35  
36  
37 collaboration with Josai University, Sakado, Japan, and Social Insurance Omiya  
38  
39  
40 General Hospital that have been conducted to elucidate the relationships between  
41  
42  
43 lifestyle-related diseases and cardiometabolic risk factors. We recruited, at random,  
44  
45  
46 2,472 asymptomatic subjects aged 30–79 years who underwent thorough annual  
47  
48  
49 medical check-ups, in which the subjects underwent a more extensive array of clinical  
50  
51  
52 tests than would be performed in routine check-ups, at the Social Insurance Omiya  
53  
54  
55  
56 General Hospital, Saitama, Japan, between April 2009 and March 2010. The protocol  
57  
58  
59  
60

1  
2 was approved by The Ethics Committee of Josai University and the Council of the  
3  
4 Hospital, and informed consent was obtained from all participants.  
5  
6

7  
8 The exclusion criteria and a flow chart summarizing subject disposition are shown  
9  
10 in *Supplemental Figure 1*. To exclude subjects with latent conditions likely to  
11  
12 adversely affect the results, we excluded those with C-reactive protein  $\geq 10.0$  mg/l,  
13  
14 estimated glomerular filtration rate (eGFR)  $\leq 35$  ml/min/1.73 m<sup>2</sup>, serum amylase  $\leq 30$   
15  
16 IU/l (the lower 5<sup>th</sup> percentile in an earlier study [12]) or  $\geq 200$  IU/l based on previous  
17  
18 reports [21,22], as well as subjects suspected of having cancer. In the current analysis,  
19  
20 to investigate the potential relationship between serum amylase and cardiometabolic  
21  
22 features, including NAFLD, we included subjects with a wider range of serum amylase  
23  
24 levels than the current reference ranges.  
25  
26  
27  
28  
29  
30  
31  
32

33  
34 Subjects completed a questionnaire recording lifestyle factors, including habitual  
35  
36 alcohol consumption, which was classified in terms of the frequency (none, occasional,  
37  
38 and daily) and the amount of ethanol consumed per day (< 20 g, 20–39 g, 40–59 g, or  $\geq$   
39  
40 60 g). Subjects who habitually consumed  $\geq 20$  g ethanol per day were excluded from the  
41  
42 study. Subjects positive for hepatic B virus surface antigen were also excluded. Hepatic  
43  
44 C virus infection was not measured in this study. We also excluded subjects with other  
45  
46 active liver diseases not examined, by excluded those with elevated serum liver enzyme  
47  
48 levels (approximately three times the upper limit of normal): alanine aminotransferase  
49  
50 (ALT)  $\geq 150$  IU/ml, aspartate aminotransferase (AST)  $\geq 150$  IU/ml, or  
51  
52  
53  
54  
55  
56  
57  
58  
59  
60



1  $\gamma$ -glutamyltransferase (GGT)  $\geq$  150 IU/ml. Consequently, a total of 1,475 individuals  
2  
3  
4 were included in this study.  
5  
6  
7  
8  
9

### 10 **Laboratory measurements**

11  
12 Laboratory and anthropometric tests, and an abdominal ultrasound were performed in  
13  
14 the early morning after an overnight fast. Serum parameters were measured using an  
15  
16 AutoAnalyzer (Hitachi, Tokyo, Japan). The serum amylase level was measured using an  
17  
18 enzymatic method (L-type Amylase; Wako, Tokyo, Japan) with a detection limit of 1.7  
19  
20 IU/l, and a run-to-run coefficient of variation of < 5.0%.  
21  
22  
23  
24  
25  
26  
27

28 Abdominal ultrasound for the detection of fatty liver was carried out by registered  
29  
30 medical sonographers who only work at Social Insurance Omiya General Hospital. The  
31  
32 sonographers were blinded to the subjects' data. Fatty liver, which was determined by  
33  
34 comparing liver echogenicity with that of the renal cortex [23], was defined as NAFLD.  
35  
36 Additionally, the severity of NAFLD was graded into three categories: mild NAFLD, a  
37  
38 slight increase in liver echogenicity with normal visualisation of the diaphragm and the  
39  
40 portal veins; moderate NAFLD, a moderate increase in liver echogenicity with slightly  
41  
42 impaired visualisation of the diaphragm and the portal veins; and severe NAFLD, a  
43  
44 substantial increase in liver echogenicity with poor or no visualisation of the diaphragm  
45  
46 and the portal veins [24,25]. In a previous study, the ultrasonographic steatosis score  
47  
48 determined using these grades was highly correlated with the histological grade of  
49  
50  
51  
52  
53  
54  
55  
56  
57  
58  
59  
60

1 steatosis ( $r = 0.80$ ,  $P < 0.001$ ), but not with inflammatory activity ( $r = 0.10$ ) or fibrosis  
2  
3  
4 score ( $r = 0.19$ ) [25]. Therefore, the grade of NAFLD in this study probably reflects  
5  
6  
7 overall hepatic fat accumulation, rather than the severity of fibrosis. Since it is possible  
8  
9  
10 that mild NAFLD could include a normal liver, we defined overt NAFLD as moderate  
11  
12  
13 or severe NAFLD. We also examined the findings of gallstones, cholecystectomy, and  
14  
15  
16 splenomegaly, which was defined as a spleen index (calculated as the long dimension  $\times$   
17  
18  
19 short dimension on splenotomogram)  $\geq 30$  [26,27].

20  
21  
22 The liver fibrosis scores, the AST/ALT ratio [28] and FIB-4 were calculated in all  
23  
24  
25 patients, using a previously published formula:

$$26 \text{ FIB-4} = \text{age (years)} \times \text{AST/platelet count (} 10^9/\text{l)} \times \text{ALT}^{1/2} \text{ [29]}$$

27  
28  
29  
30 The diagnosis of MetS was based on the Adult Treatment Panel-III criteria [30]  
31  
32  
33 with the following cut-off limits: 1) systolic blood pressure  $\geq 130$  mmHg or diastolic  
34  
35  
36 blood pressure  $\geq 85$  mmHg; 2) triglyceride  $\geq 150$  mg/dl; 3) high-density  
37  
38  
39 lipoprotein-cholesterol  $< 40$  mg/dl for men and  $< 50$  mg/dl for women; 4) fasting  
40  
41  
42 plasma glucose  $\geq 100$  mg/dl; and 5) waist circumference  $\geq 90$  cm for men and  $\geq 80$  cm  
43  
44  
45 for women. Subjects meeting three or more of these criteria, including treatment for any  
46  
47  
48 of these disorders, were defined as having MetS. Diabetes was defined as fasting plasma  
49  
50  
51 glucose  $\geq 126$  mg/dl or glycosylated haemoglobin (HbA1c)  $\geq 6.5\%$  (by the National  
52  
53  
54 Glycoprotein Standardization Program (NGSP)) according to the American Diabetes  
55  
56  
57 Association criteria [31], or treatment with oral hypoglycaemic drugs or insulin. HbA1c  
58  
59  
60

1 (Japan Diabetes Society [JDS]) was converted to HbA1c (NGSP) units using the  
2  
3  
4  
5 officially certified formula:  $\text{HbA1c (NGSP) (\%)} = 1.02 \times \text{JDS (\%)} + 0.25\%$  [32].  
6

7  
8 Since serum amylase can be affected by kidney function because of its excretion  
9  
10 by the kidney [4,5], eGFR was considered as a confounding factor and was calculated  
11  
12 using the following equation for Japanese subjects [33]:  $\text{eGFR (ml/min/1.73 m}^2\text{)} = 194$   
13  
14  $\times \text{serum Cr}^{-1.094} \times \text{age}^{-0.287}$  (if female)  $\times 0.739$ . Here, Cr = serum creatinine  
15  
16  
17  
18  
19 concentration (mg/dl).  
20  
21  
22  
23  
24

### 25 **Statistical analysis**

26  
27 Data are expressed as the mean  $\pm$  standard deviation (SD) or median (interquartile  
28  
29 range). Subjects were divided into quartiles according to serum amylase levels, where  
30  
31 Q1 is the highest quartile and Q4 is the lowest quartile. *P*-values for continuous  
32  
33 variables were determined using analysis of variance (ANOVA) or the Mann-Whitney  
34  
35 *U* test, and for categorical variables using the  $\chi^2$  test. Highly skewed values (ALT, AST,  
36  
37 GGT, and triglyceride) were log-transformed before analysis. Subjects were also  
38  
39 stratified into four groups according to the grade of NAFLD (i.e., normal, mild,  
40  
41 moderate, and severe NAFLD). Multivariate logistic regression models were used to  
42  
43 examine the associations of quartiles (Q2–4) of serum amylase with any-grade NAFLD  
44  
45 (NAFLD-AG), and with overt NAFLD relative to Q1, controlling for relevant  
46  
47  
48  
49  
50  
51  
52  
53  
54  
55  
56  
57  
58  
59  
60 confounding factors, including MetS, diabetes, and body mass index (BMI) or waist

1 circumference (WC). To elucidate any association between LSA and NAFLD, we  
2  
3  
4 examined the associations between LSA and NAFLD-AG, and between LSA and overt  
5  
6  
7 NAFLD. This analysis yielded odds ratios (OR) and 95% confidential intervals (95%  
8  
9  
10 CI). Tests for linear trends ( $P$  for trend) were calculated by treating the quartiles as a  
11  
12  
13 continuous variable (i.e., 1–4), and the same model analysis was conducted. Statistical  
14  
15  
16 analyses were performed using SPSS software version 18.0 (SPSS-IBM, Chicago, IL,  
17  
18  
19 USA) and Statview version 5.0 (SAS Institute, Cary, NC, USA). Values of  $P < 0.05$   
20  
21  
22 were considered to be statistically significant.  
23  
24  
25  
26  
27

## 28 RESULTS

29  
30 The clinical characteristics of the subjects according to the quartile of serum amylase  
31  
32 are shown in Table 1. The mean and median values of most clinical parameters,  
33  
34 including platelet count and eGFR, increased significantly as serum amylase decreased,  
35  
36  
37 although there was a significant trend for subjects with lower amylase levels to be  
38  
39  
40 younger. No significant trend in HbA1c was observed against quartiles of serum  
41  
42  
43 amylase. The prevalence of NAFLD-AG and overt NAFLD increased significantly,  
44  
45  
46 from 22.5% to 42.4% and from 9.2% to 24%, respectively, from the highest (Q1) to the  
47  
48  
49 lowest serum amylase quartile (Q4). There were no significant differences in the  
50  
51  
52 prevalence rates of gallstones, cholecystectomy, or splenomegaly between quartiles,  
53  
54  
55 possibly because of the small numbers of subjects with these features, although the rates  
56  
57  
58  
59  
60

1 of cholecystectomy and splenomegaly were higher in Q4 compared with the other  
2  
3  
4 quartiles. Log-transformed serum ALT and GGT increased significantly, whereas the  
5  
6  
7 AST/ALT ratio and FIB-4 decreased significantly with decreasing serum amylase  
8  
9  
10 quartile.

11  
12  
13 When subjects were stratified according to NAFLD grade, serum amylase  
14  
15 decreased significantly with advancing grade of NAFLD (Figure 1). When subjects  
16  
17 were further stratified according to sex, there was no significant difference between men  
18  
19 and women. However, when the subjects were stratified according to high or low BMI  
20  
21 (Figure 2), serum amylase levels were significantly lower in overweight/obese subjects  
22  
23 (BMI  $\geq 25.0$  kg/m<sup>2</sup>, mean  $\pm$  SD BMI, 27.3  $\pm$  2.3 kg/m<sup>2</sup>, n = 1,121) than in lean subjects  
24  
25 (BMI < 25.0 kg/m<sup>2</sup>, mean  $\pm$  SD BMI, 21.6  $\pm$  2.0 kg/m<sup>2</sup>, n = 354). Serum amylase levels  
26  
27 in lean subjects decreased significantly with advancing grade of NAFLD, whereas those  
28  
29 in obese subjects did not. Significant differences between lean and obese subjects were  
30  
31 only observed in subjects with a normal liver or mild NAFLD. We did not conduct an  
32  
33 analysis by further stratification according to MetS or diabetes because of the small  
34  
35 proportion of subjects (both, < 10%).  
36  
37  
38  
39  
40  
41  
42  
43  
44  
45  
46  
47

48 Multiple logistic regression analysis showed that, compared with the highest  
49  
50 quartile of serum amylase ( $\geq 90$  IU/l, Q1), the lowest quartile (< 60 IU/l, Q4) was  
51  
52 significantly associated with NAFLD-AG even after adjusting for confounders plus  
53  
54 MetS or diabetes (Table 2, Models 4 and 5). In these conditions, MetS (OR: 3.66, 95%  
55  
56  
57  
58  
59  
60

1  
2 CI: 2.37–5.65) and diabetes (OR: 1.96, 95% CI: 1.25–3.05) were significantly  
3  
4 associated with Q4 of serum amylase (data not shown). However, these associations  
5  
6 were markedly attenuated and were no longer statistically significant after adjusting for  
7  
8 clinical confounders plus BMI or WC (Models 6 and 7), although there was a trend  
9  
10 towards an association among the quartiles of serum amylase.  
11  
12  
13  
14

15  
16 When we excluded subjects with mild NAFLD (n = 242) and repeated the  
17  
18 analysis (Table 3), we detected stronger significant associations between Q4 and overt  
19  
20 NAFLD. These associations were also moderately attenuated after additional adjustment  
21  
22 for BMI or WC, but they remained statistically significant (Models 6 and 7). In this  
23  
24 condition, BMI (OR: 1.65, 95% CI: 1.51–1.80) and WC (OR: 1.21, 95% CI: 1.17–1.25)  
25  
26 were significantly associated with overt NAFLD (data not shown).  
27  
28  
29  
30  
31  
32  
33  
34  
35

## 36 DISCUSSION

37  
38 For the last few decades, NAFLD has been considered as a manifestation of MetS and  
39  
40 insulin resistance [14-18]. In this context, the present study showed that LSA was  
41  
42 significantly associated with NAFLD-AG in asymptomatic adults, independent of MetS,  
43  
44 diabetes, and sex. Furthermore, LSA may be indicative of overt NAFLD, i.e., moderate  
45  
46 or severe NAFLD, independent of obesity. These findings are not inconsistent because  
47  
48 NAFLD may reflect insulin resistance, more so than MetS, in individuals without  
49  
50 diabetes or obesity [17,19,20].  
51  
52  
53  
54  
55  
56  
57  
58  
59  
60

1  
2 This study provided evidence that NAFLD can occur in lean individuals, who  
3  
4 accounted for 37.8% (62/104) of subjects with moderate NAFLD and 19.3% (11/57) of  
5  
6  
7 subjects with severe NAFLD (Figure 2). This is consistent with the results of  
8  
9  
10 multivariate logistic analysis, where there was a significant trend for NAFLD against  
11  
12  
13 quartiles of serum amylase, and the significant association between the lowest quartile  
14  
15  
16 of serum amylase and NAFLD remained after adjusting for BMI and WC (Tables 2 and  
17  
18  
19 3).

20  
21  
22  
23  
24  
25 ***Potential mechanisms of the inverse relationship between serum amylase and***  
26  
27  
28 ***NAFLD***

29  
30 We found no significant difference in serum amylase levels between lean and obese  
31  
32 subjects with overt NAFLD, suggesting that the effects of obesity on serum amylase are  
33  
34 apparent in subjects with a normal liver or with mild NAFLD, but not in subjects with  
35  
36  
37 overt NAFLD. Several studies have shown that NAFLD occurs in non-obese people,  
38  
39  
40 although the prevalence of NAFLD in non-obese subjects is lower than that in obese  
41  
42  
43 subjects [19,20,34]. Therefore, other than obesity, factors not examined in this study  
44  
45  
46 might also explain the association between LSA and NAFLD. Insulin resistance and  
47  
48  
49 obesity-related hormones, such as leptin, may be potential factors, because insulin  
50  
51  
52 resistance and energy imbalance are common pathophysiological findings in obese  
53  
54  
55 individuals [17,35]. Indeed, obesity plus insulin resistance is more closely associated  
56  
57  
58  
59  
60

1 with metabolic abnormalities and NAFLD than is obesity without insulin resistance [17].  
2  
3  
4 Hyperinsulinaemia caused by insulin resistance stimulates *de novo* lipogenesis in the  
5  
6  
7 liver through sterol regulatory element binding protein-1c (SREBP-1c) [36],  
8  
9  
10 irrespective of the influx of fatty acid from a meal and lipolysis in adipose tissues.  
11  
12  
13 Additionally, we recently reported a latent association between LSA and insulin  
14  
15  
16 resistance in a small study of asymptomatic middle-aged adults [37], supporting the  
17  
18  
19 hypothesis that LSA may be associated with NAFLD, at least in part through insulin  
20  
21  
22 resistance. However, because insulin resistance, as determined by the homeostasis  
23  
24  
25 model assessment of insulin resistance for example, was not examined in this study,  
26  
27  
28 further large epidemiological studies evaluating insulin resistance are needed to confirm  
29  
30  
31 the current hypothesis.  
32

33  
34 As another explanation for the inverse relationship between serum amylase and  
35  
36  
37 NAFLD, systemic ectopic fat deposition in organs including the pancreas (i.e., fatty  
38  
39  
40 pancreas) might contribute to the observed associations. This is because intrapancreatic  
41  
42  
43 fat, particularly intralobular pancreatic fat, was reported to be associated with NAFLD  
44  
45  
46 and MetS [38,39]. An animal study showed that obese mice had a heavier pancreas and  
47  
48  
49 more intrapancreatic fat [40]. Therefore, systemic fat deposits in multiple organs may be  
50  
51  
52 a common cause underlying the association between NAFLD and overall pancreatic  
53  
54  
55 dysfunction, which may result in impaired exocrine function, characterised as LSA.  
56

57 Gene polymorphisms of patatin-like phospholipase domain containing 3  
58  
59  
60



1 (PNPLA3) may also contribute to the strength of these associations. For example, a  
2  
3  
4 common variant of the PNPLA3 gene (rs738409) was reported to be associated with  
5  
6  
7 increased hepatic fat content (i.e., NAFLD) [41]. In the mouse liver,  
8  
9  
10 adiponutrin/PNPLA3 gene expression is under the direct transcriptional control of  
11  
12  
13 SREBP-1c, in response to insulin [42].  
14  
15  
16  
17  
18

### 19 *Serum amyalse and glucose metabolism*

20  
21 The prevalence of diabetes increased with decreasing serum amylase quartile in this  
22  
23 study. However, similar to an earlier study [12], HbA1c was not associated with LSA,  
24  
25 probably because most subjects in the lowest quartile of serum amylase in this study  
26  
27  
28 had no or only mild insulin resistance or mild hyperinsulinaemia, which is likely  
29  
30  
31 compensated for and results in euglycaemia or mild hyperglycaemia. In such conditions,  
32  
33  
34 fasting plasma glucose would increase linearly, as observed in Table 1, in response to  
35  
36  
37 insulin resistance, particularly in the early stage of diabetes [43,44].  
38  
39  
40  
41  
42  
43  
44

### 45 *Serum amyalse and hepatic fibrosis*

46  
47 To date, some markers have been considered for screening for NAFLD and mild hepatic  
48  
49 fibrosis [45-47]. In this study, while the AST/ALT ratio and Fib-4 decreased  
50  
51  
52 significantly with the decreasing quartile of serum amylase, the platelet count increased  
53  
54  
55  
56 (Table 1). Consequently, hepatic fibrosis is unlikely to be associated with NAFLD in  
57  
58  
59  
60

1 this study. A plausible explanation is that this study mostly consisted of non-obese  
2  
3 individuals, with a small proportion having MetS and diabetes, resulting in a lower  
4  
5 likelihood of advanced hepatic fibrosis and NASH. In fact, the estimated prevalence of  
6  
7 NASH in this study is quite low when we compare it with the prevalence of NASH in a  
8  
9 nationwide study in Japan. It was reported that approximately 20–25% of patients with  
10  
11 diabetes had NAFLD, a population in which the prevalence of NASH might be 30–40%  
12  
13 [48]. Therefore, the estimated prevalence of NASH might be less than 1% of all of the  
14  
15 subjects in this study. In addition, the fact that more than half of the subjects in this  
16  
17 study had repeatedly undergone detailed medical check-ups may also contribute to the  
18  
19 lower prevalence of NASH, because repeated check-ups may promote consciousness of  
20  
21 healthcare and favourable lifestyles.  
22  
23  
24  
25  
26  
27  
28  
29  
30  
31  
32  
33  
34  
35  
36

### 37 **Limitations**

38  
39 Several limitations should be mentioned. First, NAFLD was diagnosed by ultrasound  
40  
41 rather than by histological examination, the gold standard technique for the diagnosis of  
42  
43 NAFLD. Thus, NAFLD and the degree of hepatic fibrosis could be inaccurately  
44  
45 evaluated, particularly in the early stages. In earlier studies, ultrasonography had a  
46  
47 sensitivity of 60–94% and a specificity of 66–95% for detecting fatty liver [24,49].  
48  
49  
50  
51 However, its sensitivity is reduced in subjects with a small amount of fat (< 30%), such  
52  
53  
54  
55  
56  
57  
58  
59  
60 as those with mild NAFLD or advanced fibrosis, [14]. To improve the accuracy of

1 detecting and grading of NAFLD, the use of other imaging modalities might be needed,  
2  
3  
4 such as magnetic resonance imaging and magnetic resonance spectroscopy, which were  
5  
6  
7 reported to provide useful quantitative data in earlier studies [50,51].  
8  
9

10 Second, hepatitis C virus infection was not measured in this study. However, the  
11  
12 prevalence of hepatitis C infection was reported to be 1.5–2.3% in Japan [52]. Low  
13  
14 prevalence rates of hepatitis C (< 1.5%) were also recently reported in Asian-Pacific,  
15  
16 tropical Latin American, and North American countries [53]. Therefore, hepatitis C  
17  
18 infection is unlikely to profoundly modify the association between LSA and NAFLD in  
19  
20 this study, although hepatitis C infection can contribute to the development of NAFLD  
21  
22 [54]. It is also possible that individuals with primary biliary cirrhosis, autoimmune  
23  
24 hepatitis or other forms of liver dysfunction (e.g., haemochromatosis and Wilson  
25  
26 disease) were included in the present study, even though we excluded subjects with  
27  
28 elevated hepatic enzymes ( $\geq 150$  IU/ml). However, the prevalence of these diseases is  
29  
30 quite low in the general population [55-57].  
31  
32  
33  
34  
35  
36  
37  
38  
39  
40  
41

42 Third, because of the cross-sectional nature of the study, we could not determine  
43  
44 the cause–effect relationship between LSA and NAFLD. However, in a previous  
45  
46 retrospective study [12], subjects with LSA at baseline were more likely to develop  
47  
48 MetS-related metabolic abnormalities 5 years later. Longitudinal prospective studies or  
49  
50 clinical intervention trials are needed to elucidate the causality of the associations  
51  
52  
53  
54 reported here.  
55  
56  
57  
58  
59  
60

1  
2  
3  
4  
5  
6  
7  
8  
9  
10  
11  
12  
13  
14  
15  
16  
17  
18  
19  
20  
21  
22  
23  
24  
25  
26  
27  
28  
29  
30  
31  
32  
33  
34  
35  
36  
37  
38  
39  
40  
41  
42  
43  
44  
45  
46  
47  
48  
49  
50  
51  
52  
53  
54  
55  
56  
57  
58  
59  
60

Finally, the clinical relevance of measuring serum amylase remains unclear. The current results suggest that LSA is likely to detect overt NAFLD, but not NASH, which is the most important hepatic disorder. However, from the cardiometabolic perspective, even simple steatosis may be important, particularly in nonobese people, because steatosis may be more strongly associated with insulin resistance than is obesity [17,19,20]. Currently, serum amylase is rarely considered in clinical practice, except in certain situations, such as suspected pancreatitis. Therefore, numerous clinical and animal studies are needed to validate and confirm the clinical relevance of measuring serum amylase before it can be introduced into primary care for the detection of cardiometabolic diseases and NAFLD.

### **Conclusion**

Our results suggest that LSA may be associated with NAFLD, particularly moderate or severe NAFLD, in asymptomatic adults. This association was independent of MetS, diabetes, and obesity. Further studies are needed to confirm the observed associations, and to explore the clinical relevance of LSA.

**Acknowledgments** None

1  
2 **Competing interests** The authors declare that they have no competing interests.  
3  
4  
5  
6

7 **Funding** This research received no specific grant from any funding agency in the public,  
8  
9 commercial, or not-for-profit sectors.  
10  
11  
12

13  
14  
15  
16 **Contributors** KN, HM, and MK designed the collaborative project; KN, HO, TM, and  
17  
18 HF collected and analysed the data; KN, HO, MS, and YH researched and evaluated the  
19  
20 literature; and KN wrote the first draft of the manuscript. All authors reviewed and  
21  
22 edited the manuscript, and approved the final version of the manuscript.  
23  
24  
25  
26  
27  
28  
29  
30

31 **Data sharing statement** There are no additional data available.  
32  
33  
34  
35  
36  
37  
38  
39  
40  
41  
42  
43  
44  
45  
46  
47  
48  
49  
50  
51  
52  
53  
54  
55  
56  
57  
58  
59  
60

## REFERENCES

1. Yegneswaran B, Pitchumoni CS. Yegneswaran B, et al. When should serum amylase and lipase levels be repeated in a patient with acute pancreatitis? *Cleve Clin J Med* 2010;77:230–1.
2. Skrha J, Stěpán J. Clinical significance of amylase isoenzyme determination. *Acta Univ Carol Med Monogr* 1987;120:1–81.
3. Pieper-Bigelow C, Strocchi A, Levitt MD. Where does serum amylase come from and where does it go? *Gastroenterol Clin North Am* 1990;19:793–810.
4. Junge W, Mályusz M, Ehrens HJ. The role of the kidney in the elimination of pancreatic lipase and amylase from blood. *J Clin Chem Clin Biochem* 1985;23:387–92.
5. Collen MJ, Ansher AF, Chapman AB, et al. Serum amylase in patients with renal insufficiency and renal failure. *Am J Gastroenterol* 1990;85:1377–80.
6. Domínguez-Muñoz JE, Pieramico O, Büchler M, et al. Ratios of different serum pancreatic enzymes in the diagnosis and staging of chronic pancreatitis. *Digestion* 1993;54:231–6.
7. Wolf RO, Hubbard VS, Gillard BK, et al. Three methods compared for determination of pancreatic and salivary amylase activity in serum of cystic fibrosis patients. *Clin Chem* 1986;32:296–300.
8. Frier BM, Faber OK, Binder C, et al. The effect of residual insulin secretion on

- 1  
2 exocrine pancreatic function in juvenile-onset diabetes mellitus. *Diabetologia*  
3  
4  
5 1978;14:301–4.  
6  
7  
8 9. Dandona P, Freedman DB, Foo Y, et al. Exocrine pancreatic function in diabetes  
9  
10 mellitus. *J Clin Pathol* 1984;37:302–6  
11  
12  
13 10. Swislocki A, Noth R, Hallstone A, et al. Secretin-stimulated amylase release into  
14  
15 blood is impaired in type 1 diabetes mellitus. *Horm Metab Res* 2005;37:326–330.  
16  
17  
18 11. Aughsteen AA, Abu-Umair MS, Mahmoud SA. Biochemical analysis of serum  
19  
20 pancreatic amylase and lipase enzymes in patients with type 1 and type 2 diabetes  
21  
22 mellitus. *Saudi Med J* 2005;26:73–7.  
23  
24  
25  
26  
27 12. Nakajima K, Nemoto T, Muneyuki T, et al. Low serum amylase in association with  
28  
29 metabolic syndrome and diabetes: A community-based study. *Cardiovasc Diabetol*  
30  
31 2011;10:34.  
32  
33  
34  
35  
36 13. Lee JG, Park SW, Cho BM, et al. Serum amylase and risk of the metabolic  
37  
38 syndrome in Korean adults. *Clin Chim Acta* 2011; 412:1848–53  
39  
40  
41  
42 14. Neuschwander-Tetri BA, Caldwell SH. Nonalcoholic steatohepatitis: summary of  
43  
44 an AASLD Single Topic Conference. *Hepatology* 2003;37:1202–19.  
45  
46  
47  
48 15. Smith BW, Adams LA. Non-alcoholic fatty liver disease. *Crit Rev Clin Lab Sci*  
49  
50 2011;48:97–113.  
51  
52  
53  
54 16. Stefan N, Häring HU. The metabolically benign and malignant fatty liver. *Diabetes*  
55  
56 2011;60:2011–7.  
57  
58  
59  
60

- 1  
2  
3  
4  
5  
6  
7  
8  
9  
10  
11  
12  
13  
14  
15  
16  
17  
18  
19  
20  
21  
22  
23  
24  
25  
26  
27  
28  
29  
30  
31  
32  
33  
34  
35  
36  
37  
38  
39  
40  
41  
42  
43  
44  
45  
46  
47  
48  
49  
50  
51  
52  
53  
54  
55  
56  
57  
58  
59  
60
17. Stefan N, Kantartzis K, Machann J, et al. Identification and characterization of metabolically benign obesity in humans. *Arch Intern Med* 2008;168:1609–16.
  18. Angelico F, Del Ben M, Conti R, et al. Insulin resistance, the metabolic syndrome, and nonalcoholic fatty liver disease. *J Clin Endocrinol Metab* 2005; 90:1578–82.
  19. Kim HJ, Kim HJ, Lee KE, et al. Metabolic significance of nonalcoholic fatty liver disease in nonobese, nondiabetic adults. *Arch Intern Med* 2004;164:2169–75.
  20. Musso G, Gambino R, Bo S, et al. Should nonalcoholic fatty liver disease be included in the definition of metabolic syndrome? A cross-sectional comparison with Adult Treatment Panel III criteria in nonobese nondiabetic subjects. *Diabetes Care* 2008;31:562–8.
  21. Keogh JB, McGeeney KF, Drury MI, et al. Renal clearance of pancreatic and salivary amylase relative to creatinine in patients with chronic renal insufficiency. *Gut* 1978;19:1125–30.
  22. Okura Y, Hayashi K, Shingu T, et al. Diagnostic evaluation of acute pancreatitis in two patients with hypertriglyceridemia. *World J Gastroenterol* 2004;10:3691–5.
  23. Tchelepi H, Ralls PW, Radin R, et al. Sonography of diffuse liver disease. *J Ultrasound Med* 2002;21:1023–32.
  24. Schwenzer NF, Springer F, Schraml C, et al. Non-invasive assessment and quantification of liver steatosis by ultrasound, computed tomography and magnetic resonance. *J Hepatol* 2009;51:433–45.



- 1  
2  
3  
4  
5  
6  
7  
8  
9  
10  
11  
12  
13  
14  
15  
16  
17  
18  
19  
20  
21  
22  
23  
24  
25  
26  
27  
28  
29  
30  
31  
32  
33  
34  
35  
36  
37  
38  
39  
40  
41  
42  
43  
44  
45  
46  
47  
48  
49  
50  
51  
52  
53  
54  
55  
56  
57  
58  
59  
60
25. Shannon A, Alkhoury N, Carter-Kent C, et al. Ultrasonographic quantitative estimation of hepatic steatosis in children With NAFLD. *J Pediatr Gastroenterol Nutr* 2011;53:190–5.
  26. Ishibashi H, Higuchi N, Shimamura R, et al. Sonographic assessment and grading of spleen size. *J Clin Ultrasound* 1991;19:21–5.
  27. Kataoka M, Nakata Y, Maeda T, et al. Ultrasonographic analysis of splenomegaly in patients with sarcoidosis. *Nihon Kyobu Shikkan Gakkai Zasshi* 1990;28:750–5. [In Japanese]
  28. Iacobellis A, Marcellini M, Andriulli A, et al. Non invasive evaluation of liver fibrosis in paediatric patients with nonalcoholic steatohepatitis. *World J Gastroenterol* 2006;12:7821–5.
  29. Vallet-Pichard A, Mallet V, Nalpas B, et al. FIB-4: an inexpensive and accurate marker of fibrosis in HCV infection. *Hepatology* 2007;46:32–6.
  30. Grundy SM, Cleeman JI, Daniels SR, et al. Diagnosis and management of the metabolic syndrome: an American Heart Association/National Heart, Lung, and Blood Institute Scientific Statement. *Circulation* 2005;112:2735–52.
  31. American Diabetes Association. Diagnosis and classification of diabetes mellitus. *Diabetes Care* 2010;33 Suppl 1:S62–9.
  32. Kashiwagi A, Kasuga M, Araki E, et al. International clinical harmonization of glycated hemoglobin in Japan: From Japan Diabetes Society to National

- 1  
2 Glycohemoglobin Standardization Program values. *J Diabetes Investig*  
3  
4  
5 2012;3:39–40.  
6  
7  
8 33. Matsuo S, Imai E, Horio M, et al. Revised equations for estimated GFR from serum  
9  
10 creatinine in Japan. *Am J Kidney Dis* 2009;53:982–92.  
11  
12  
13 34. Das K, Das K, Mukherjee PS, et al. Nonobese population in a developing country  
14  
15 has a high prevalence of nonalcoholic fatty liver and significant liver disease.  
16  
17  
18  
19  
20  
21  
22  
23 35. Gautron L, Elmquist JK. Sixteen years and counting: an update on leptin in energy  
24  
25 balance. *J Clin Invest* 2011;121:2087–93.  
26  
27  
28 36. Dentin R, Pégrier JP, Benhamed F, et al. Hepatic glucokinase is required for the  
29  
30 synergistic action of ChREBP and SREBP-1c on glycolytic and lipogenic gene  
31  
32 expression. *J Biol Chem* 2004;279:20314–26.  
33  
34  
35  
36 37. Muneyuki T, Nakajima K, Aoki A, et al. Latent associations of low serum amylase  
37  
38 with decreased plasma insulin levels and insulin resistance in asymptomatic  
39  
40 middle-aged adults. *Cardiovasc Diabetol* 2012;11:80.  
41  
42  
43  
44  
45 38. van Geenen EJ, Smits MM, Schreuder TC, et al. Nonalcoholic fatty liver disease is  
46  
47 related to nonalcoholic fatty pancreas disease. *Pancreas* 2010;39:1185–90.  
48  
49  
50  
51 39. Sepe PS, Ohri A, Sanaka S, et al. A prospective evaluation of fatty pancreas by  
52  
53 using EUS. *Gastrointest Endosc* 2011;73:987–93.  
54  
55  
56  
57 40. Mathur A, Marine M, Lu D, et al. Nonalcoholic fatty pancreas disease. *HPB*  
58  
59  
60

- 1  
2 (Oxford) 2007;9:312–8.  
3  
4  
5 41. Sookoian S, Pirola CJ. Meta-analysis of the influence of I148M variant of  
6  
7 patatin-like phospholipase domain containing 3 gene (PNPLA3) on the  
8  
9 susceptibility and histological severity of nonalcoholic fatty liver disease.  
10  
11  
12  
13 *Hepatology* 2011;53:1883–94.  
14  
15  
16 42. Dubuquoy C, Robichon C, Lasnier F, et al. Distinct regulation of  
17  
18 adiponutrin/PNPLA3 gene expression by the transcription factors ChREBP and  
19  
20  
21  
22 SREBP1c in mouse and human hepatocytes. *J Hepatol* 2011;55:145–53.  
23  
24  
25 43. Reaven G. Wanted!: a standardized measurement of plasma insulin concentration.  
26  
27  
28 *Arterioscler Thromb Vasc Biol* 2011;31:954–55.  
29  
30  
31 44. Robins SJ, Lyass A, Zachariah JP, et al. Insulin resistance and the relationship of a  
32  
33  
34 dyslipidemia to coronary heart disease: the Framingham Heart Study. *Arterioscler*  
35  
36  
37 *Thromb Vasc Biol* 2011;31:1208–14.  
38  
39  
40 45. Williams AL, Hoofnagle JH. Ratio of serum aspartate to alanine aminotransferase  
41  
42  
43 in chronic hepatitis. Relationship to cirrhosis. *Gastroenterology* 1988;95:734–9.  
44  
45  
46 46. Angulo P, Hui JM, Marchesini G, et al. The NAFLD fibrosis score: a noninvasive  
47  
48  
49 system that identifies liver fibrosis in patients with NAFLD. *Hepatology*  
50  
51  
52 2007;45:846–54.  
53  
54  
55 47. McPherson S, Stewart SF, Henderson E, et al. Simple non-invasive fibrosis scoring  
56  
57  
58 systems can reliably exclude advanced fibrosis in patients with non-alcoholic fatty  
59  
60

- 1  
2 liver disease. *Gut* 2010;59:1265–9.  
3  
4  
5 48. Okanoue T, Umemura A, Yasui K, et al. Nonalcoholic fatty liver disease and  
6  
7 nonalcoholic steatohepatitis in Japan. *J Gastroenterol Hepatol* 2011;26 Suppl  
8  
9 1:153–62.  
10  
11  
12  
13 49. Joseph AE, Saverymuttu SH, al-Sam S, et al. Comparison of liver histology with  
14  
15 ultrasonography in assessing diffuse parenchymal liver disease. *Clin Radiol*  
16  
17 1991;43:26–31.  
18  
19  
20  
21  
22 50. Schwenzer NF, Springer F, Schraml C, et al. Non-invasive assessment and  
23  
24 quantification of liver steatosis by ultrasound, computed tomography and magnetic  
25  
26 resonance. *J Hepatol* 2009;51:433–45.  
27  
28  
29  
30  
31 51. Wong VW, Chu WC, Wong GL, et al. Prevalence of non-alcoholic fatty liver  
32  
33 disease and advanced fibrosis in Hong Kong Chinese: a population study using  
34  
35 proton-magnetic resonance spectroscopy and transient elastography. *Gut*  
36  
37 2012;61:409–15.  
38  
39  
40  
41  
42 52. Shepard CW, Finelli L, Alter MJ. Global epidemiology of hepatitis C virus  
43  
44 infection. *Lancet Infect Dis* 2005;5:558–67.  
45  
46  
47  
48 53. Hanafiah KM, Groeger J, Flaxman AD, et al. Global epidemiology of hepatitis C  
49  
50 virus infection: New estimates of age-specific antibody to hepatitis C virus  
51  
52 seroprevalence. *Hepatology* 2012 Nov 21.  
53  
54  
55  
56  
57 54. Pattullo V, Douglas MW, George J. Organelle dysfunction in hepatitis C  
58  
59  
60

1 virus-associated steatosis: anything to learn from nonalcoholic steatohepatitis?  
2  
3

4 *Expert Rev Gastroenterol Hepatol* 2011;5:265–77.  
5  
6

7 55. Kumagi T, Heathcote EJ. Primary biliary cirrhosis. *Orphanet J Rare Dis* 2008;3:1.  
8  
9

10 56. Strassburg CP. Autoimmune hepatitis. *Best Pract Res Clin Gastroenterol*  
11  
12

13 2010;24:667–82.  
14  
15

16 57. Oh RC, Husted TR. Causes and evaluation of mildly elevated liver transaminase  
17  
18

19 levels. *Am Fam Physician* 2011;84:1003–8.  
20  
21  
22  
23  
24  
25  
26  
27  
28  
29  
30  
31  
32  
33  
34  
35  
36  
37  
38  
39  
40  
41  
42  
43  
44  
45  
46  
47  
48  
49  
50  
51  
52  
53  
54  
55  
56  
57  
58  
59  
60

## Figure Legends

**Figure 1** Serum amylase levels according to the grade of NAFLD and sex. Serum amylase levels decreased significantly with advancing grade of NAFLD in both sexes (ANOVA, both  $P = 0.0001$ ). There was no significant difference between men and women (two-way ANOVA,  $P = 0.45$ ). \*Number of subjects in each group. Bars represent standard errors.

**Figure 2** Serum amylase levels according to the grade of NAFLD and obesity. Obesity was defined as  $BMI \geq 25.0 \text{ kg/m}^2$ . Serum amylase levels decreased significantly with advancing grade of NAFLD in lean subjects (ANOVA,  $P = 0.01$ ), but not in obese subjects ( $P = 0.33$ ). An overall significant difference was observed between lean and obese subjects (two-way ANOVA,  $P = 0.03$ ). \*Number of subjects in each group; † $P = 0.0001$  and ‡ $P = 0.02$  for lean versus obese subjects (Mann–Whitney  $U$  test). Bars represent standard errors.

## Supplement Figure 1

Exclusion criteria of subjects and flow chart

**Table 1. Characteristics of subjects stratified according to quartiles of serum amylase**

|                                    | Total       | Q1 (Highest) | Q2          | Q3          | Q4 (Lowest) | <i>P</i> value |
|------------------------------------|-------------|--------------|-------------|-------------|-------------|----------------|
| n                                  | 1,475       | 369          | 371         | 381         | 354         |                |
| Age, y                             | 55.1 ± 12.2 | 58.4 ± 11.8  | 56.4 ± 12.2 | 52.9 ± 11.7 | 52.7 ± 12.0 | < 0.0001       |
| Men, n (%)                         | 747 (50.6)  | 178 (48.2)   | 176 (47.4)  | 205 (53.8)  | 188 (53.1)  | 0.19           |
| BMI, kg/m <sup>2</sup>             | 23.0 ± 3.2  | 21.9 ± 2.7   | 22.6 ± 3.2  | 23.3 ± 3.1  | 24.1 ± 3.4  | < 0.0001       |
| WC, cm                             | 80.8 ± 8.9  | 78.2 ± 8.3   | 79.9 ± 8.8  | 81.8 ± 8.8  | 83.2 ± 9.1  | < 0.0001       |
| Systolic blood pressure, mmHg      | 120 ± 18.9  | 119 ± 18.5   | 119 ± 18.7  | 120 ± 18.9  | 123 ± 19.1  | 0.007          |
| Diastolic blood pressure, mmHg     | 74.1 ± 12.6 | 72.6 ± 12.2  | 73.1 ± 11.9 | 74.5 ± 13.4 | 76.1 ± 12.4 | 0.0009         |
| Platelet count, 10 <sup>9</sup> /L | 235 ± 53.4  | 228 ± 53.8   | 235 ± 53.1  | 237 ± 51.1  | 241 ± 55.2  | 0.01           |
| ALT, IU/l                          | 18 (14–25)  | 18 (14–23)   | 17 (14–23)  | 18 (14–25)  | 19 (14–29)  | < 0.0001       |
| AST, IU/l                          | 20 (17–24)  | 21 (19–25)   | 20 (17–24)  | 19 (17–23)  | 20 (17–24)  | 0.04           |
| AST/ALT                            | 1.15 ± 0.36 | 1.24 ± 0.35  | 1.20 ± 0.37 | 1.12 ± 0.33 | 1.04 ± 0.35 | < 0.0001       |

|                                   |                  |                  |                  |                  |                  |          |
|-----------------------------------|------------------|------------------|------------------|------------------|------------------|----------|
| FIB-4                             | 1.13 (0.82–1.52) | 1.33 (0.98–1.76) | 1.20 (0.89–1.59) | 1.05 (0.76–1.38) | 0.98 (0.70–1.36) | < 0.0001 |
| GGT, IU/l                         | 22 (16–33)       | 20 (15–31)       | 20 (16–30)       | 23 (16–34)       | 24 (17–38)       | 0.0009   |
| C-reactive protein                | 0.4 (0.3–0.8)    | 0.3 (0.3–0.63)   | 0.4 (0.3–0.8)    | 0.4 (0.3–0.8)    | 0.5 (0.3–1.1)    | < 0.0001 |
| Amylase, IU/l                     | 77.3 ± 24.9      | 110 ± 22.0       | 81.3 ± 4.7       | 66.6 ± 4.1       | 50.3 ± 7.0       | —        |
| (range)                           | (30–200)         | (90–200)         | (74–89)          | (60–73)          | (30–59)          |          |
| Triglyceride, mg/dl               | 88 (64–128)      | 83 (63–121)      | 84 (62–123)      | 88 (65–128)      | 100 (65–143)     | 0.001    |
| HDL-cholesterol, mg/dl            | 61.2 ± 15.0      | 64.2 ± 15.4      | 62.6 ± 14.8      | 59.8 ± 14.6      | 58.3 ± 14.5      | < 0.0001 |
| Fasting plasma glucose, mg/dl     | 99.6 ± 16.7      | 97.5 ± 13.4      | 97.4 ± 11.4      | 101 ± 19.4       | 103 ± 20.4       | < 0.0001 |
| HbA1c (NGSP), %                   | 5.7 ± 0.6        | 5.7 ± 0.5        | 5.7 ± 0.4        | 5.7 ± 0.6        | 5.8 ± 0.7        | 0.14     |
| eGFR, ml/min/1.73m <sup>2</sup>   | 75.0 ± 13.9      | 71.0 ± 14.3      | 74.3 ± 12.9      | 76.0 ± 14.2      | 78.7 ± 13.1      | < 0.0001 |
| ATP-III-Metabolic syndrome, n (%) | 139 (9.4)        | 16 (4.3)         | 23 (6.2)         | 47 (12.3)        | 53 (15.0)        | < 0.0001 |
| Diabetes, n (%)                   | 114 (7.7)        | 19 (5.1)         | 17 (4.6)         | 34 (8.9)         | 44 (12.4)        | 0.0002   |
| NAFLD of all grades, n (%)        | 463 (31.4)       | 83 (22.5)        | 97 (26.1)        | 133 (34.9)       | 150 (42.4)       | < 0.0001 |



|                                   |            |           |           |           |           |          |
|-----------------------------------|------------|-----------|-----------|-----------|-----------|----------|
| Moderate to severe NAFLD, n (%)   | 221 (15.0) | 34 (9.2)  | 42 (11.3) | 60 (15.7) | 85 (24.0) | < 0.0001 |
| Gallstones, n (%)                 | 81 (5.5)   | 21 (5.7)  | 20 (5.4)  | 24 (6.3)  | 16 (5.2)  | 0.76     |
| Cholecystectomy, n (%)            | 23 (1.6)   | 5 (1.4)   | 3 (0.8)   | 5 (1.3)   | 10 (2.8)  | 0.15     |
| Splenomegaly, n (%)               | 9 (0.6)    | 1 (0.3)   | 1 (0.3)   | 0         | 7 (2.0)   | —*       |
| Medical history of                |            |           |           |           |           |          |
| Cardiovascular diseases, n (%)    | 55 (3.7)   | 11 (3.0)  | 20 (5.4)  | 11 (2.9)  | 13 (3.7)  | 0.24     |
| Stroke, n (%)                     | 26 (1.8)   | 12 (3.3)  | 6 (1.6)   | 4 (1.1)   | 4 (1.1)   | 0.08     |
| Medications for                   |            |           |           |           |           |          |
| Hypertension, n (%)               | 237 (16.1) | 64 (17.3) | 47 (12.7) | 67 (17.6) | 59 (16.7) | 0.22     |
| Hypercholesterolemia, n (%)       | 177 (12.0) | 56 (15.2) | 43 (11.6) | 34 (8.9)  | 44 (12.4) | 0.07     |
| Diabetes, n (%)                   | 56 (3.8)   | 12 (3.3)  | 12 (3.2)  | 15 (3.9)  | 17 (4.8)  | 0.65     |
| Current smoker, n (%)             | 273 (18.5) | 40 (10.8) | 50 (13.5) | 86 (22.6) | 97 (27.4) | < 0.0001 |
| Everyday alcohol consumers, n (%) | 229 (15.5) | 51 (13.8) | 59 (15.9) | 66 (17.3) | 53 (15.0) | 0.61     |

---

|                         |            |            |            |            |            |      |
|-------------------------|------------|------------|------------|------------|------------|------|
| Regular exercise, n (%) | 507 (34.4) | 144 (39.0) | 135 (36.4) | 125 (32.9) | 103 (29.1) | 0.03 |
|-------------------------|------------|------------|------------|------------|------------|------|

---

Data are means  $\pm$ SD and medians (interquartile range). *P*-values for continuous variables and categorical variables were determined by analysis of variance and the  $\chi^2$

test, respectively. Regular exercise:  $\geq 30$  min exercise per session at least twice a week.

\*Statistical analysis was not performed because of the small number of subjects with splenomegaly.

**Table 2. Odds ratios for NAFLD-AG according to serum amylase quartiles**

| Serum amylase quartiles | Q1 (Highest) | Q2               | Q3               | Q4 (Lowest)      | <i>P</i> for trend |
|-------------------------|--------------|------------------|------------------|------------------|--------------------|
| n                       | 369          | 371              | 381              | 354              |                    |
| Model 1                 | 1            | 1.22 (0.87–1.71) | 1.85 (1.34–2.55) | 2.53 (1.84–3.50) | < 0.0001           |
| Model 2                 | 1            | 1.28 (0.91–1.81) | 1.96 (1.39–2.74) | 2.74 (1.95–3.85) | < 0.0001           |
| Model 3                 | 1            | 1.35 (0.93–1.97) | 2.03 (1.41–2.94) | 2.41 (1.66–3.51) | < 0.0001           |
| Model 4                 | 1            | 1.25 (0.86–1.82) | 1.83 (1.26–2.65) | 2.18 (1.49–3.18) | < 0.0001           |
| Model 5                 | 1            | 1.31 (0.90–1.90) | 2.00 (1.39–2.89) | 2.36 (1.62–3.44) | < 0.0001           |
| Model 6                 | 1            | 0.99 (0.66–1.49) | 1.34 (0.89–2.01) | 1.42 (0.94–2.15) | 0.04               |
| Model 7                 | 1            | 1.02 (0.68–1.53) | 1.30 (0.87–1.94) | 1.49 (0.99–2.24) | 0.03               |

Model 1: unadjusted.

Model 2: adjusted for age, sex, and current smoking (*versus* non-smokers).

Model 3: Model 2 plus adjustment for log-transformed ALT, regular exercise (*versus* infrequent exercise), daily alcohol consumption (*versus* infrequent/no alcohol)

1  
2  
3  
4 consumption), eGFR, past history of heart diseases and stroke, and medications for hypertension, diabetes, and dyslipidemia.  
5  
6

7 Model 4: Model 3 plus adjustment for diabetes, but excluding medications for hypertension, diabetes, and dyslipidemia.  
8  
9

10 Model 5: Model 3 plus adjustment for metabolic syndrome, but excluding medications for hypertension, diabetes, and dyslipidemia.  
11  
12

13 Model 6: Model 3 plus adjustment for BMI.  
14  
15

16 Model 7: Model 3 plus adjustment for WC.  
17  
18  
19  
20  
21  
22  
23  
24  
25  
26  
27  
28  
29  
30  
31  
32  
33  
34  
35  
36  
37  
38  
39  
40  
41  
42  
43  
44  
45

**Table 3. Odds ratios of each serum amylase for NAFLD of moderate or severe grade**

| Serum amylase quartiles | Q1 (Highest) | Q2               | Q3               | Q4 (Lowest)      | <i>P</i> for trend |
|-------------------------|--------------|------------------|------------------|------------------|--------------------|
| N*                      | 320          | 316              | 308              | 289              |                    |
| Model 1                 | 1            | 1.29 (0.80–2.09) | 2.04 (1.29–3.20) | 3.51 (2.27–5.42) | < 0.0001           |
| Model 2                 | 1            | 1.36 (0.83–2.22) | 2.14 (1.33–3.44) | 3.81 (2.40–6.05) | < 0.0001           |
| Model 3                 | 1            | 1.61 (0.91–2.86) | 2.32 (1.32–4.07) | 3.45 (1.99–6.00) | < 0.0001           |
| Model 4                 | 1            | 1.48 (0.84–2.64) | 2.11 (1.19–3.73) | 2.97 (1.70–5.20) | < 0.0001           |
| Model 5                 | 1            | 1.56 (0.89–2.75) | 2.32 (1.33–4.04) | 3.26 (1.88–5.66) | < 0.0001           |
| Model 6                 | 1            | 1.05 (0.54–2.03) | 1.44 (0.76–2.72) | 2.01 (1.07–3.78) | 0.01               |
| Model 7                 | 1            | 1.06 (0.55–2.05) | 1.37 (0.73–2.59) | 2.06 (1.09–3.87) | 0.01               |

\*Subjects with mild NAFLD (n = 242) were excluded from this analysis. Models 1–7 are the same as those in **Table 2**.

1  
2  
3  
4  
5  
6  
7  
8  
9  
10  
11  
12  
13  
14  
15  
16  
17  
18  
19  
20  
21  
22  
23  
24  
25  
26  
27  
28  
29  
30  
31  
32  
33  
34  
35  
36  
37  
38  
39  
40  
41  
42  
43  
44  
45  
46  
47  
48  
49  
50  
51  
52  
53  
54  
55  
56  
57  
58  
59  
60

**Independent association between low serum amylase and non-alcoholic fatty liver disease in asymptomatic adults: A cross-sectional observational study**

Short title: Low serum amylase and non-alcoholic fatty liver disease

Kei Nakajima<sup>1,4\*</sup>, Haruki Oshida<sup>1</sup> Toshitaka Muneyuki,<sup>2</sup> Masafumi Saito,<sup>1</sup> Yumiko Hori,<sup>1</sup> Hiroshi Fuchugami,<sup>3</sup> Masafumi Kakei<sup>2</sup>, Hiromi Munakata<sup>4</sup>

\*Correspondence to Kei Nakajima, M.D., Ph.D., Division of Clinical Nutrition,  
Department of Medical Dietetics, Faculty of Pharmaceutical Sciences, Josai University,  
1-1 Keyakidai, Sakado, Saitama, 350-0295, Japan  
email: [keinaka@josai.ac.jp](mailto:keinaka@josai.ac.jp); Tel: +81-49-271-7260; Fax: +81-49-271-7260

1 Division of Clinical Nutrition, Department of Medical Dietetics, Faculty of  
Pharmaceutical Sciences, Josai University, 1-1 Keyakidai, Sakado, Saitama 350-0295,  
Japan

2 First Department of Comprehensive Medicine, Saitama Medical Center, Jichi Medical  
University School of Medicine, 1-847 Amanuma, Omiya, Saitama 330-8503, Japan

3 Department of Health Care Center, Social Insurance Omiya General Hospital, 453  
Bonsai, Kita, Saitama 331-0805, Japan

1  
2 4 Department of Internal Medicine, Social Insurance Omiya General Hospital, 453  
3

4  
5 Bonsai, Kita, Saitama 331-0805, Japan  
6  
7  
8  
9

10 **Key words:** serum amylase, NAFLD, metabolic syndrome, diabetes  
11

12  
13 **Word count:** 3334 words  
14  
15  
16  
17  
18  
19  
20  
21  
22  
23  
24  
25  
26  
27  
28  
29  
30  
31  
32  
33  
34  
35  
36  
37  
38  
39  
40  
41  
42  
43  
44  
45  
46  
47  
48  
49  
50  
51  
52  
53  
54  
55  
56  
57  
58  
59  
60

For peer review only

**ABSTRACT**

**Objectives:** Low serum amylase (LSA) was reported to be associated with obesity, metabolic syndrome (MetS), and diabetes. However, it is unknown whether LSA is associated with non-alcoholic fatty liver disease (NAFLD), a hepatic manifestation of MetS and insulin resistance. Therefore, we performed a clinical epidemiological study to investigate this potential association.

**Design:** A cross-sectional observational study with multivariate analysis.

**Setting:** Subjects were recruited in a healthcare centre in Saitama, an eastern district of Japan, near Tokyo.

**Participants:** A total of 1,475 asymptomatic adults aged 30–79 years who underwent detailed medical check-ups and who regularly consumed small amounts of alcohol (< 20 g/day).

**Outcome measures:** Serum amylase, cardiometabolic risk factors, NAFLD determined by ultrasound, MetS determined by Adult Treatment Panel-III criteria, and diabetes were assessed.

**Results:** The prevalence of NAFLD increased significantly from 22.5% to 42.4% (all grades) and from 9.2% to 24.0% (moderate or severe grade) from the highest to the lowest quartile of serum amylase. Multiple logistic regression analysis showed that, compared with the highest quartile of serum amylase, the lowest quartile of serum amylase was significantly associated with any-grade NAFLD and with moderate to



1 severe NAFLD, even after adjusting for MetS or diabetes. The association between LSA  
2  
3  
4 and any-grade NAFLD disappeared after further adjustment for body mass index or  
5  
6  
7 waist circumference, whereas the association between LSA and moderate or severe  
8  
9  
10 NAFLD remained statistically significant [odds ratios (95% confidence interval), 2.01  
11  
12  
13 (1.07–3.78) and 2.06 (1.09–3.87), respectively, both  $P = 0.01$ ].  
14  
15

16 **Conclusions:** Our results suggest that LSA may be associated with moderate or severe  
17  
18  
19 NAFLD in asymptomatic adults independent of MetS, diabetes, and obesity. These  
20  
21  
22 results warrant confirmation in further studies.  
23

24 (274/300 words)  
25  
26  
27  
28  
29  
30  
31  
32  
33  
34  
35  
36  
37  
38  
39  
40  
41  
42  
43  
44  
45  
46  
47  
48  
49  
50  
51  
52  
53  
54  
55  
56  
57  
58  
59  
60

## ARTICLE SUMMARY

### Article focus

- The clinical relevance of low serum amylase (LSA) is unclear, but it is putatively associated with obesity-related metabolic abnormalities.
- It is unknown whether LSA is associated with non-alcoholic fatty liver disease (NAFLD), a hepatic manifestation of cardiometabolic disease and insulin resistance.

### Key messages

- Our results suggest that LSA is associated with NAFLD independent of metabolic syndrome, diabetes, and obesity.
- LSA may be an independent marker for moderate or severe NAFLD.

### Strengths and limitations of this study

- A possible association between LSA and NAFLD was evaluated after fully adjusting for relevant confounding factors.
- NAFLD was diagnosed with ultrasound in this study. Other methods, such as computed tomography, magnetic resonance imaging, and fibroscan, may provide more precise assessment of NAFLD.
- This was an observational study and the cause–effect relationship is unknown.

## INTRODUCTION

Abnormal serum amylase levels generally reflect overall dysfunction of the pancreas or salivary glands. Although the clinical relevance of elevated serum amylase levels has been extensively studied in relation to various conditions, including acute pancreatitis, pancreatic cancer, ectopic amylase-producing tumours, abdominal trauma, and kidney dysfunction [1-5], the clinical relevance of low serum amylase (LSA) has not been examined. LSA is conventionally considered as a crude marker for diffuse pancreas destruction secondary to pancreatic diseases, such as advanced chronic pancreatitis and cystic fibrosis [6,7]. LSA or low pancreatic amylase is also associated with insulin deficiency in patients with type 1 diabetes and in patients with longstanding type 2 diabetes [8-11]. In our recent community-based study, LSA, defined as a serum amylase concentration of < 60 IU/l, was observed in 25% of asymptomatic individuals [12]. LSA is also associated with metabolic syndrome (MetS), a cluster of cardiovascular risk factors, and diabetes [12,13]. However, obesity is thought to be the strongest predictor of LSA in the asymptomatic general population [12].

In the last two decades, there has been a marked increase in the prevalence of non-alcoholic fatty liver disease (NAFLD) worldwide, along with an obesity pandemic [14,15]. NAFLD often progresses to a more severe condition, non-alcoholic steatohepatitis (NASH), and increased hepatic fibrosis is a significant histological feature of advanced NASH. NAFLD is considered to be a hepatic manifestation of

1  
2  
3  
4  
5  
6  
7  
8  
9  
10  
11  
12  
13  
14  
15  
16  
17  
18  
19  
20  
21  
22  
23  
24  
25  
26  
27  
28  
29  
30  
31  
32  
33  
34  
35  
36  
37  
38  
39  
40  
41  
42  
43  
44  
45  
46  
47  
48  
49  
50  
51  
52  
53  
54  
55  
56  
57  
58  
59  
60

MetS and insulin resistance [14-18], which suggests that NAFLD consists of a wide spectrum of cardiometabolic diseases. It is also possible that NAFLD may reflect more pronounced insulin resistance compared with MetS in certain clinical settings, including in individuals without diabetes or obesity [17,19,20]. In this context, we hypothesised that LSA may be associated with NAFLD independently of MetS, type 2 diabetes, and even obesity. The aim of this study was to test this hypothesis and to investigate the clinical relevance of LSA, which is often observed in clinical practice. Therefore, we examined the associations among serum amylase, cardiometabolic risk factors, NAFLD, hepatic fibrosis, MetS, and diabetes in a cross-sectional study of asymptomatic adults.

## METHODS

### Protocol and subjects

The present report represents a series of observational studies performed in collaboration with Josai University, Sakado, Japan, and Social Insurance Omiya General Hospital that have been conducted to elucidate the relationships between lifestyle-related diseases and cardiometabolic risk factors. We recruited, at random, 2,472 asymptomatic subjects aged 30–79 years who underwent thorough annual medical check-ups, in which the subjects underwent a more extensive array of clinical tests than would be performed in routine check-ups, at the Social Insurance Omiya General Hospital, Saitama, Japan, between April 2009 and March 2010. The protocol

1 was approved by The Ethics Committee of Josai University and the Council of the  
2  
3  
4 Hospital, and informed consent was obtained from all participants.  
5  
6

7 The exclusion criteria and a flow chart summarizing subject disposition are shown  
8  
9  
10 in *Supplemental Figure 1*. To exclude subjects with latent conditions likely to  
11  
12 adversely affect the results, we excluded those with C-reactive protein  $\geq 10.0$  mg/l,  
13  
14 estimated glomerular filtration rate (eGFR)  $\leq 35$  ml/min/1.73 m<sup>2</sup>, serum amylase  $\leq 30$   
15  
16 IU/l (the lower 5<sup>th</sup> percentile in an earlier study [12]) or  $\geq 200$  IU/l based on previous  
17  
18 reports [21,22], as well as subjects suspected of having cancer. In the current analysis,  
19  
20 to investigate the potential relationship between serum amylase and cardiometabolic  
21  
22 features, including NAFLD, we included subjects with a wider range of serum amylase  
23  
24 levels than the current reference ranges.  
25  
26  
27  
28  
29  
30  
31  
32

33 Subjects completed a questionnaire recording lifestyle factors, including habitual  
34  
35 alcohol consumption, which was classified in terms of the frequency (none, occasional,  
36  
37 and daily) and the amount of ethanol consumed per day (< 20 g, 20–39 g, 40–59 g, or  $\geq$   
38  
39 60 g). Subjects who habitually consumed  $\geq 20$  g ethanol per day were excluded from the  
40  
41 study. Subjects positive for hepatic B virus surface antigen were also excluded. Hepatic  
42  
43 C virus infection was not measured in this study. We also excluded subjects with other  
44  
45 active liver diseases not examined, by excluded those with elevated serum liver enzyme  
46  
47 levels (approximately three times the upper limit of normal): alanine aminotransferase  
48  
49 (ALT)  $\geq 150$  IU/ml, aspartate aminotransferase (AST)  $\geq 150$  IU/ml, or  
50  
51  
52  
53  
54  
55  
56  
57  
58  
59  
60

1  
2  $\gamma$ -glutamyltransferase (GGT)  $\geq$  150 IU/ml. Consequently, a total of 1,475 individuals  
3  
4  
5 were included in this study.  
6  
7  
8  
9

### 10 **Laboratory measurements**

11  
12  
13 Laboratory and anthropometric tests, and an abdominal ultrasound were performed in  
14  
15  
16 the early morning after an overnight fast. Serum parameters were measured using an  
17  
18  
19 AutoAnalyzer (Hitachi, Tokyo, Japan). The serum amylase level was measured using an  
20  
21  
22 enzymatic method (L-type Amylase; Wako, Tokyo, Japan) with a detection limit of 1.7  
23  
24  
25 IU/l, and a run-to-run coefficient of variation of  $<$  5.0%.  
26  
27

28 Abdominal ultrasound for the detection of fatty liver was carried out by **registered**  
29  
30 **medical sonographers who only work at Social Insurance Omiya General Hospital. The**  
31  
32 **sonographers were blinded to the subjects' data.** Fatty liver, which was **determined by**  
33  
34 **comparing liver echogenicity with that of the renal cortex [23],** was defined as NAFLD.  
35  
36  
37 **Additionally,** the severity of NAFLD was graded into three categories: mild NAFLD, a  
38  
39  
40 slight increase in liver echogenicity with normal visualisation of the diaphragm and the  
41  
42  
43 portal veins; moderate NAFLD, a moderate increase in liver echogenicity with slightly  
44  
45  
46 impaired visualisation of the diaphragm and the portal veins; and severe NAFLD, a  
47  
48  
49 substantial increase in liver echogenicity with poor or no visualisation of the diaphragm  
50  
51  
52 and the portal veins [24,25]. **In a previous study, the ultrasonographic steatosis score**  
53  
54  
55 **determined using these grades was highly correlated with the histological grade of**  
56  
57  
58  
59  
60

1 steatosis ( $r = 0.80$ ,  $P < 0.001$ ), but not with inflammatory activity ( $r = 0.10$ ) or fibrosis  
2  
3  
4 score ( $r = 0.19$ ) [25]. Therefore, the grade of NAFLD in this study probably reflects  
5  
6  
7 overall hepatic fat accumulation, rather than the severity of fibrosis. Since it is possible  
8  
9  
10 that mild NAFLD could include a normal liver, we defined overt NAFLD as moderate  
11  
12  
13 or severe NAFLD. We also examined the findings of gallstones, cholecystectomy, and  
14  
15  
16 splenomegaly, which was defined as a spleen index (calculated as the long dimension  $\times$   
17  
18  
19 short dimension on splenotomogram)  $\geq 30$  [26,27].  
20

21  
22 The liver fibrosis scores, the AST/ALT ratio [28] and FIB-4 were calculated in all  
23  
24 patients, using a previously published formula:

$$25 \text{ FIB-4} = \text{age (years)} \times \text{AST/platelet count (10}^9\text{/l)} \times \text{ALT}^{1/2} \text{ [29]}$$

30  
31 The diagnosis of MetS was based on the Adult Treatment Panel-III criteria [30]  
32  
33 with the following cut-off limits: 1) systolic blood pressure  $\geq 130$  mmHg or diastolic  
34  
35 blood pressure  $\geq 85$  mmHg; 2) triglyceride  $\geq 150$  mg/dl; 3) high-density  
36  
37 lipoprotein-cholesterol  $< 40$  mg/dl for men and  $< 50$  mg/dl for women; 4) fasting  
38  
39 plasma glucose  $\geq 100$  mg/dl; and 5) waist circumference  $\geq 90$  cm for men and  $\geq 80$  cm  
40  
41 for women. Subjects meeting three or more of these criteria, including treatment for any  
42  
43 of these disorders, were defined as having MetS. Diabetes was defined as fasting plasma  
44  
45 glucose  $\geq 126$  mg/dl or glycosylated haemoglobin (HbA1c)  $\geq 6.5\%$  (by the National  
46  
47 Glycoprotein Standardization Program (NGSP)) according to the American Diabetes  
48  
49 Association criteria [31], or treatment with oral hypoglycaemic drugs or insulin. HbA1c  
50  
51  
52  
53  
54  
55  
56  
57  
58  
59  
60

1  
2 (Japan Diabetes Society [JDS]) was converted to HbA1c (NGSP) units using the  
3  
4  
5 officially certified formula:  $\text{HbA1c (NGSP) (\%)} = 1.02 \times \text{JDS (\%)} + 0.25\%$  [32].  
6

7  
8 Since serum amylase can be affected by kidney function because of its excretion  
9  
10 by the kidney [4,5], eGFR was considered as a confounding factor and was calculated  
11  
12 using the following equation for Japanese subjects [33]:  $\text{eGFR (ml/min/1.73 m}^2\text{)} = 194$   
13  
14  $\times \text{serum Cr}^{-1.094} \times \text{age}^{-0.287}$  (if female)  $\times 0.739$ . Here, Cr = serum creatinine  
15  
16  
17  
18  
19 concentration (mg/dl).  
20  
21  
22  
23  
24

### 25 **Statistical analysis**

26  
27 Data are expressed as the mean  $\pm$  standard deviation (SD) or median (interquartile  
28  
29 range). Subjects were divided into quartiles according to serum amylase levels, where  
30  
31 Q1 is the highest quartile and Q4 is the lowest quartile. *P*-values for continuous  
32  
33 variables were determined using analysis of variance (ANOVA) or the Mann-Whitney  
34  
35 *U* test, and for categorical variables using the  $\chi^2$  test. Highly skewed values (ALT, AST,  
36  
37 GGT, and triglyceride) were log-transformed before analysis. Subjects were also  
38  
39 stratified into four groups according to the grade of NAFLD (i.e., normal, mild,  
40  
41 moderate, and severe NAFLD). Multivariate logistic regression models were used to  
42  
43 examine the associations of quartiles (Q2–4) of serum amylase with any-grade NAFLD  
44  
45 (NAFLD-AG), and with overt NAFLD relative to Q1, controlling for relevant  
46  
47  
48  
49  
50  
51  
52  
53  
54  
55  
56  
57  
58  
59  
60 confounding factors, including MetS, diabetes, and body mass index (BMI) or waist



1 circumference (WC). To elucidate any association between LSA and NAFLD, we  
2  
3  
4 examined the associations between LSA and NAFLD-AG, and between LSA and overt  
5  
6  
7 NAFLD. This analysis yielded odds ratios (OR) and 95% confidential intervals (95%  
8  
9  
10 CI). Tests for linear trends ( $P$  for trend) were calculated by treating the quartiles as a  
11  
12  
13 continuous variable (i.e., 1–4), and the same model analysis was conducted. Statistical  
14  
15  
16 analyses were performed using SPSS software version 18.0 (SPSS-IBM, Chicago, IL,  
17  
18  
19 USA) and Statview version 5.0 (SAS Institute, Cary, NC, USA). Values of  $P < 0.05$   
20  
21  
22 were considered to be statistically significant.  
23  
24  
25  
26  
27

## 28 RESULTS

29  
30 The clinical characteristics of the subjects according to the quartile of serum amylase  
31  
32 are shown in Table 1. The mean and median values of most clinical parameters,  
33  
34 including platelet count and eGFR, increased significantly as serum amylase decreased,  
35  
36  
37 although there was a significant trend for subjects with lower amylase levels to be  
38  
39  
40 younger. No significant trend in HbA1c was observed against quartiles of serum  
41  
42  
43 amylase. The prevalence of NAFLD-AG and overt NAFLD increased significantly,  
44  
45  
46 from 22.5% to 42.4% and from 9.2% to 24%, respectively, from the highest (Q1) to the  
47  
48  
49 lowest serum amylase quartile (Q4). There were no significant differences in the  
50  
51  
52 prevalence rates of gallstones, cholecystectomy, or splenomegaly between quartiles,  
53  
54  
55 possibly because of the small numbers of subjects with these features, although the rates  
56  
57  
58  
59  
60

1  
2  
3  
4  
5  
6  
7  
8  
9  
10  
11  
12  
13  
14  
15  
16  
17  
18  
19  
20  
21  
22  
23  
24  
25  
26  
27  
28  
29  
30  
31  
32  
33  
34  
35  
36  
37  
38  
39  
40  
41  
42  
43  
44  
45  
46  
47  
48  
49  
50  
51  
52  
53  
54  
55  
56  
57  
58  
59  
60

of cholecystectomy and splenomegaly were higher in Q4 compared with the other quartiles. Log-transformed serum ALT and GGT increased significantly, whereas the AST/ALT ratio and FIB-4 decreased significantly with decreasing serum amylase quartile.

When subjects were stratified according to NAFLD grade, serum amylase decreased significantly with advancing grade of NAFLD (Figure 1). When subjects were further stratified according to sex, there was no significant difference between men and women. However, when the subjects were stratified according to high or low BMI (Figure 2), serum amylase levels were significantly lower in overweight/obese subjects ( $\text{BMI} \geq 25.0 \text{ kg/m}^2$ , mean  $\pm$  SD BMI,  $27.3 \pm 2.3 \text{ kg/m}^2$ ,  $n = 1,121$ ) than in lean subjects ( $\text{BMI} < 25.0 \text{ kg/m}^2$ , mean  $\pm$  SD BMI,  $21.6 \pm 2.0 \text{ kg/m}^2$ ,  $n = 354$ ). Serum amylase levels in lean subjects decreased significantly with advancing grade of NAFLD, whereas those in obese subjects did not. Significant differences between lean and obese subjects were only observed in subjects with a normal liver or mild NAFLD. We did not conduct an analysis by further stratification according to MetS or diabetes because of the small proportion of subjects (both,  $< 10\%$ ).

Multiple logistic regression analysis showed that, compared with the highest quartile of serum amylase ( $\geq 90 \text{ IU/l}$ , Q1), the lowest quartile ( $< 60 \text{ IU/l}$ , Q4) was significantly associated with NAFLD-AG even after adjusting for confounders plus MetS or diabetes (Table 2, Models 4 and 5). In these conditions, MetS (OR: 3.66, 95%

1  
2 CI: 2.37–5.65) and diabetes (OR: 1.96, 95% CI: 1.25–3.05) were significantly  
3  
4 associated with Q4 of serum amylase (data not shown). However, these associations  
5  
6 were markedly attenuated and were no longer statistically significant after adjusting for  
7  
8 clinical confounders plus BMI or WC (Models 6 and 7), although there was a trend  
9  
10 towards an association among the quartiles of serum amylase.  
11  
12  
13  
14

15  
16 When we excluded subjects with mild NAFLD (n = 242) and repeated the  
17  
18 analysis (Table 3), we detected stronger significant associations between Q4 and overt  
19  
20 NAFLD. These associations were also moderately attenuated after additional adjustment  
21  
22 for BMI or WC, but they remained statistically significant (Models 6 and 7). In this  
23  
24 condition, BMI (OR: 1.65, 95% CI: 1.51–1.80) and WC (OR: 1.21, 95% CI: 1.17–1.25)  
25  
26 were significantly associated with overt NAFLD (data not shown).  
27  
28  
29  
30  
31  
32  
33  
34  
35

## 36 DISCUSSION

37  
38 For the last few decades, NAFLD has been considered as a manifestation of MetS and  
39  
40 insulin resistance [14-18]. In this context, the present study showed that LSA was  
41  
42 significantly associated with NAFLD-AG in asymptomatic adults, independent of MetS,  
43  
44 diabetes, and sex. Furthermore, LSA may be indicative of overt NAFLD, i.e., moderate  
45  
46 or severe NAFLD, independent of obesity. These findings are not inconsistent because  
47  
48 NAFLD may reflect insulin resistance, more so than MetS, in individuals without  
49  
50 diabetes or obesity [17,19,20].  
51  
52  
53  
54  
55  
56  
57  
58  
59  
60

1  
2  
3  
4  
5  
6  
7  
8  
9  
10  
11  
12  
13  
14  
15  
16  
17  
18  
19  
20  
21  
22  
23  
24  
25  
26  
27  
28  
29  
30  
31  
32  
33  
34  
35  
36  
37  
38  
39  
40  
41  
42  
43  
44  
45  
46  
47  
48  
49  
50  
51  
52  
53  
54  
55  
56  
57  
58  
59  
60

This study provided evidence that NAFLD can occur in lean individuals, who accounted for 37.8% (62/104) of subjects with moderate NAFLD and 19.3% (11/57) of subjects with severe NAFLD (Figure 2). This is consistent with the results of multivariate logistic analysis, where there was a significant trend for NAFLD against quartiles of serum amylase, and the significant association between the lowest quartile of serum amylase and NAFLD remained after adjusting for BMI and WC (Tables 2 and 3).

### *Potential mechanisms of the inverse relationship between serum amylase and NAFLD*

We found no significant difference in serum amylase levels between lean and obese subjects with overt NAFLD, suggesting that the effects of obesity on serum amylase are apparent in subjects with a normal liver or with mild NAFLD, but not in subjects with overt NAFLD. Several studies have shown that NAFLD occurs in non-obese people, although the prevalence of NAFLD in non-obese subjects is lower than that in obese subjects [19,20,34]. Therefore, other than obesity, factors not examined in this study might also explain the association between LSA and NAFLD. Insulin resistance and obesity-related hormones, such as leptin, may be potential factors, because insulin resistance and energy imbalance are common pathophysiological findings in obese individuals [17,35]. Indeed, obesity plus insulin resistance is more closely associated

1 with metabolic abnormalities and NAFLD than is obesity without insulin resistance [17].  
2  
3  
4 Hyperinsulinaemia caused by insulin resistance stimulates *de novo* lipogenesis in the  
5  
6  
7 liver through sterol regulatory element binding protein-1c (SREBP-1c) [36],  
8  
9  
10 irrespective of the influx of fatty acid from a meal and lipolysis in adipose tissues.  
11  
12  
13 Additionally, we recently reported a latent association between LSA and insulin  
14  
15  
16 resistance in a small study of asymptomatic middle-aged adults [37], supporting the  
17  
18  
19 hypothesis that LSA may be associated with NAFLD, at least in part through insulin  
20  
21  
22 resistance. However, because insulin resistance, as determined by the homeostasis  
23  
24  
25 model assessment of insulin resistance for example, was not examined in this study,  
26  
27  
28 further large epidemiological studies evaluating insulin resistance are needed to confirm  
29  
30  
31 the current hypothesis.  
32

33  
34 As another explanation for the inverse relationship between serum amylase and  
35  
36  
37 NAFLD, systemic ectopic fat deposition in organs including the pancreas (i.e., fatty  
38  
39  
40 pancreas) might contribute to the observed associations. This is because intrapancreatic  
41  
42  
43 fat, particularly intralobular pancreatic fat, was reported to be associated with NAFLD  
44  
45  
46 and MetS [38,39]. An animal study showed that obese mice had a heavier pancreas and  
47  
48  
49 more intrapancreatic fat [40]. Therefore, systemic fat deposits in multiple organs may be  
50  
51  
52 a common cause underlying the association between NAFLD and overall pancreatic  
53  
54  
55 dysfunction, which may result in impaired exocrine function, characterised as LSA.

56  
57 Gene polymorphisms of patatin-like phospholipase domain containing 3  
58  
59  
60

1 (PNPLA3) may also contribute to the strength of these associations. For example, a  
2  
3  
4 common variant of the PNPLA3 gene (rs738409) was reported to be associated with  
5  
6  
7 increased hepatic fat content (i.e., NAFLD) [41]. In the mouse liver,  
8  
9  
10 adiponutrin/PNPLA3 gene expression is under the direct transcriptional control of  
11  
12  
13 SREBP-1c, in response to insulin [42].  
14

### 15 *Serum amyalse and glucose metabolism*

16  
17  
18  
19 *The prevalence of diabetes increased with decreasing serum amyalse quartile in this*  
20  
21  
22 *study.* However, similar to an earlier study [12], HbA1c was not associated with LSA,  
23  
24  
25 probably because most subjects in the lowest quartile of serum amyalse in this study  
26  
27  
28 had no or only mild insulin resistance or mild hyperinsulinaemia, which is likely  
29  
30  
31 compensated for and results in euglycaemia *or mild hyperglycaemia.* In such conditions,  
32  
33  
34 fasting plasma glucose would increase linearly, as observed in Table 1, in response to  
35  
36  
37 insulin resistance, particularly in the early stage of diabetes [43,44].  
38  
39  
40  
41  
42  
43  
44

### 45 *Serum amyalse and hepatic fibrosis*

46  
47  
48 To date, some markers have been considered for screening for NAFLD and mild hepatic  
49  
50  
51 fibrosis [45-47]. In this study, while the AST/ALT ratio and Fib-4 decreased  
52  
53  
54 significantly with the decreasing quartile of serum amyalse, the platelet count increased  
55  
56  
57 (Table 1). Consequently, hepatic fibrosis is unlikely to be associated with NAFLD in  
58  
59  
60

1 this study. A plausible explanation is that this study mostly consisted of non-obese  
2  
3  
4 individuals, with a small proportion having MetS and diabetes, resulting in a lower  
5  
6  
7 likelihood of advanced hepatic fibrosis and NASH. In fact, the estimated prevalence of  
8  
9  
10 NASH in this study is quite low when we compare it with the prevalence of NASH in a  
11  
12  
13 nationwide study in Japan. It was reported that approximately 20–25% of patients with  
14  
15  
16 diabetes had NAFLD, a population in which the prevalence of NASH might be 30–40%  
17  
18  
19 [48]. Therefore, the estimated prevalence of NASH might be less than 1% of all of the  
20  
21  
22 subjects in this study. In addition, the fact that more than half of the subjects in this  
23  
24  
25 study had repeatedly undergone detailed medical check-ups may also contribute to the  
26  
27  
28 lower prevalence of NASH, because repeated check-ups may promote consciousness of  
29  
30  
31 healthcare and favourable lifestyles.

### 32 33 34 35 36 **Limitations**

37  
38  
39 Several limitations should be mentioned. First, NAFLD was diagnosed by ultrasound  
40  
41  
42 rather than by histological examination, the gold standard technique for the diagnosis of  
43  
44  
45 NAFLD. Thus, NAFLD and the degree of hepatic fibrosis could be inaccurately  
46  
47  
48 evaluated, particularly in the early stages. In earlier studies, ultrasonography had a  
49  
50  
51 sensitivity of 60–94% and a specificity of 66–95% for detecting fatty liver [24,49].  
52  
53  
54 However, its sensitivity is reduced in subjects with a small amount of fat (< 30%), such  
55  
56  
57 as those with mild NAFLD or advanced fibrosis, [14]. To improve the accuracy of  
58  
59  
60

1  
2  
3  
4  
5  
6  
7  
8  
9  
10  
11  
12  
13  
14  
15  
16  
17  
18  
19  
20  
21  
22  
23  
24  
25  
26  
27  
28  
29  
30  
31  
32  
33  
34  
35  
36  
37  
38  
39  
40  
41  
42  
43  
44  
45  
46  
47  
48  
49  
50  
51  
52  
53  
54  
55  
56  
57  
58  
59  
60

detecting and grading of NAFLD, the use of other imaging modalities might be needed, such as magnetic resonance imaging and magnetic resonance spectroscopy, which were reported to provide useful quantitative data in earlier studies [50,51].

Second, hepatitis C virus infection was not measured in this study. However, the prevalence of hepatitis C infection was reported to be 1.5–2.3% in Japan [52]. Low prevalence rates of hepatitis C (< 1.5%) were also recently reported in Asian-Pacific, tropical Latin American, and North American countries [53]. Therefore, hepatitis C infection is unlikely to profoundly modify the association between LSA and NAFLD in this study, although hepatitis C infection can contribute to the development of NAFLD [54]. It is also possible that individuals with primary biliary cirrhosis, autoimmune hepatitis or other forms of liver dysfunction (e.g., haemochromatosis and Wilson disease) were included in the present study, even though we excluded subjects with elevated hepatic enzymes ( $\geq 150$  IU/ml). However, the prevalence of these diseases is quite low in the general population [55-57].

Third, because of the cross-sectional nature of the study, we could not determine the cause–effect relationship between LSA and NAFLD. However, in a previous retrospective study [12], subjects with LSA at baseline were more likely to develop MetS-related metabolic abnormalities 5 years later. Longitudinal prospective studies or clinical intervention trials are needed to elucidate the causality of the associations reported here.



1  
2  
3  
4  
5  
6  
7  
8  
9  
10  
11  
12  
13  
14  
15  
16  
17  
18  
19  
20  
21  
22  
23  
24  
25  
26  
27  
28  
29  
30  
31  
32  
33  
34  
35  
36  
37  
38  
39  
40  
41  
42  
43  
44  
45  
46  
47  
48  
49  
50  
51  
52  
53  
54  
55  
56  
57  
58  
59  
60

Finally, the clinical relevance of measuring serum amylase remains unclear. The current results suggest that LSA is likely to detect overt NAFLD, but not NASH, which is the most important hepatic disorder. However, from the cardiometabolic perspective, even simple steatosis may be important, particularly in nonobese people, because steatosis may be more strongly associated with insulin resistance than is obesity [17,19,20]. Currently, serum amylase is rarely considered in clinical practice, except in certain situations, such as suspected pancreatitis. Therefore, numerous clinical and animal studies are needed to validate and confirm the clinical relevance of measuring serum amylase before it can be introduced into primary care for the detection of cardiometabolic diseases and NAFLD.

### Conclusion

Our results suggest that LSA may be associated with NAFLD, particularly moderate or severe NAFLD, in asymptomatic adults. This association was independent of MetS, diabetes, and obesity. Further studies are needed to confirm the observed associations, and to explore the clinical relevance of LSA.

**Acknowledgments** None

1  
2  
3  
4  
5  
6  
7  
8  
9  
10  
11  
12  
13  
14  
15  
16  
17  
18  
19  
20  
21  
22  
23  
24  
25  
26  
27  
28  
29  
30  
31  
32  
33  
34  
35  
36  
37  
38  
39  
40  
41  
42  
43  
44  
45  
46  
47  
48  
49  
50  
51  
52  
53  
54  
55  
56  
57  
58  
59  
60

**Competing interests** The authors declare that they have no competing interests.

**Funding** This research received no specific grant from any funding agency in the public, commercial, or not-for-profit sectors.

**Contributors** KN, HM, and MK designed the collaborative project; KN, HO, TM, and HF collected and analysed the data; KN, HO, MS, and YH researched and evaluated the literature; and KN wrote the first draft of the manuscript. All authors reviewed and edited the manuscript, and approved the final version of the manuscript.

**Data sharing statement** There are no additional data available.

## REFERENCES

1. Yegneswaran B, Pitchumoni CS. Yegneswaran B, et al. When should serum amylase and lipase levels be repeated in a patient with acute pancreatitis? *Cleve Clin J Med* 2010;77:230–1.
2. Skrha J, Stěpán J. Clinical significance of amylase isoenzyme determination. *Acta Univ Carol Med Monogr* 1987;120:1–81.
3. Pieper-Bigelow C, Strocchi A, Levitt MD. Where does serum amylase come from and where does it go? *Gastroenterol Clin North Am* 1990;19:793–810.
4. Junge W, Mályusz M, Ehrens HJ. The role of the kidney in the elimination of pancreatic lipase and amylase from blood. *J Clin Chem Clin Biochem* 1985;23:387–92.
5. Collen MJ, Ansher AF, Chapman AB, et al. Serum amylase in patients with renal insufficiency and renal failure. *Am J Gastroenterol* 1990;85:1377–80.
6. Domínguez-Muñoz JE, Pieramico O, Büchler M, et al. Ratios of different serum pancreatic enzymes in the diagnosis and staging of chronic pancreatitis. *Digestion* 1993;54:231–6.
7. Wolf RO, Hubbard VS, Gillard BK, et al. Three methods compared for determination of pancreatic and salivary amylase activity in serum of cystic fibrosis patients. *Clin Chem* 1986;32:296–300.
8. Frier BM, Faber OK, Binder C, et al. The effect of residual insulin secretion on

- 1  
2 exocrine pancreatic function in juvenile-onset diabetes mellitus. *Diabetologia*  
3  
4  
5 1978;14:301–4.  
6  
7  
8 9. Dandona P, Freedman DB, Foo Y, et al. Exocrine pancreatic function in diabetes  
9  
10 mellitus. *J Clin Pathol* 1984;37:302–6  
11  
12  
13 10. Swislocki A, Noth R, Hallstone A, et al. Secretin-stimulated amylase release into  
14  
15 blood is impaired in type 1 diabetes mellitus. *Horm Metab Res* 2005;37:326–330.  
16  
17  
18 11. Aughsteen AA, Abu-Umair MS, Mahmoud SA. Biochemical analysis of serum  
19  
20 pancreatic amylase and lipase enzymes in patients with type 1 and type 2 diabetes  
21  
22 mellitus. *Saudi Med J* 2005;26:73–7.  
23  
24  
25  
26  
27 12. Nakajima K, Nemoto T, Muneyuki T, et al. Low serum amylase in association with  
28  
29 metabolic syndrome and diabetes: A community-based study. *Cardiovasc Diabetol*  
30  
31 2011;10:34.  
32  
33  
34  
35  
36 13. Lee JG, Park SW, Cho BM, et al. Serum amylase and risk of the metabolic  
37  
38 syndrome in Korean adults. *Clin Chim Acta* 2011; 412:1848–53  
39  
40  
41  
42 14. Neuschwander-Tetri BA, Caldwell SH. Nonalcoholic steatohepatitis: summary of  
43  
44 an AASLD Single Topic Conference. *Hepatology* 2003;37:1202–19.  
45  
46  
47  
48 15. Smith BW, Adams LA. Non-alcoholic fatty liver disease. *Crit Rev Clin Lab Sci*  
49  
50 2011;48:97–113.  
51  
52  
53  
54 16. Stefan N, Häring HU. The metabolically benign and malignant fatty liver. *Diabetes*  
55  
56 2011;60:2011–7.  
57  
58  
59  
60

- 1  
2  
3  
4  
5  
6  
7  
8  
9  
10  
11  
12  
13  
14  
15  
16  
17  
18  
19  
20  
21  
22  
23  
24  
25  
26  
27  
28  
29  
30  
31  
32  
33  
34  
35  
36  
37  
38  
39  
40  
41  
42  
43  
44  
45  
46  
47  
48  
49  
50  
51  
52  
53  
54  
55  
56  
57  
58  
59  
60
17. Stefan N, Kantartzis K, Machann J, et al. Identification and characterization of metabolically benign obesity in humans. *Arch Intern Med* 2008;168:1609–16.
  18. Angelico F, Del Ben M, Conti R, et al. Insulin resistance, the metabolic syndrome, and nonalcoholic fatty liver disease. *J Clin Endocrinol Metab* 2005; 90:1578–82.
  19. Kim HJ, Kim HJ, Lee KE, et al. Metabolic significance of nonalcoholic fatty liver disease in nonobese, nondiabetic adults. *Arch Intern Med* 2004;164:2169–75.
  20. Musso G, Gambino R, Bo S, et al. Should nonalcoholic fatty liver disease be included in the definition of metabolic syndrome? A cross-sectional comparison with Adult Treatment Panel III criteria in nonobese nondiabetic subjects. *Diabetes Care* 2008;31:562–8.
  21. Keogh JB, McGeeney KF, Drury MI, et al. Renal clearance of pancreatic and salivary amylase relative to creatinine in patients with chronic renal insufficiency. *Gut* 1978;19:1125–30.
  22. Okura Y, Hayashi K, Shingu T, et al. Diagnostic evaluation of acute pancreatitis in two patients with hypertriglyceridemia. *World J Gastroenterol* 2004;10:3691–5.
  23. Tchelepi H, Ralls PW, Radin R, et al. Sonography of diffuse liver disease. *J Ultrasound Med* 2002;21:1023–32.
  24. Schwenzer NF, Springer F, Schraml C, et al. Non-invasive assessment and quantification of liver steatosis by ultrasound, computed tomography and magnetic resonance. *J Hepatol* 2009;51:433–45.

- 1  
2  
3  
4  
5  
6  
7  
8  
9  
10  
11  
12  
13  
14  
15  
16  
17  
18  
19  
20  
21  
22  
23  
24  
25  
26  
27  
28  
29  
30  
31  
32  
33  
34  
35  
36  
37  
38  
39  
40  
41  
42  
43  
44  
45  
46  
47  
48  
49  
50  
51  
52  
53  
54  
55  
56  
57  
58  
59  
60
25. Shannon A, Alkhoury N, Carter-Kent C, et al. Ultrasonographic quantitative estimation of hepatic steatosis in children With NAFLD. *J Pediatr Gastroenterol Nutr* 2011;53:190–5.
  26. Ishibashi H, Higuchi N, Shimamura R, et al. Sonographic assessment and grading of spleen size. *J Clin Ultrasound* 1991;19:21–5.
  27. Kataoka M, Nakata Y, Maeda T, et al. Ultrasonographic analysis of splenomegaly in patients with sarcoidosis. *Nihon Kyobu Shikkan Gakkai Zasshi* 1990;28:750–5. [In Japanese]
  28. Iacobellis A, Marcellini M, Andriulli A, et al. Non invasive evaluation of liver fibrosis in paediatric patients with nonalcoholic steatohepatitis. *World J Gastroenterol* 2006;12:7821–5.
  29. Vallet-Pichard A, Mallet V, Nalpas B, et al. FIB-4: an inexpensive and accurate marker of fibrosis in HCV infection. *Hepatology* 2007;46:32–6.
  30. Grundy SM, Cleeman JI, Daniels SR, et al. Diagnosis and management of the metabolic syndrome: an American Heart Association/National Heart, Lung, and Blood Institute Scientific Statement. *Circulation* 2005;112:2735–52.
  31. American Diabetes Association. Diagnosis and classification of diabetes mellitus. *Diabetes Care* 2010;33 Suppl 1:S62–9.
  32. Kashiwagi A, Kasuga M, Araki E, et al. International clinical harmonization of glycated hemoglobin in Japan: From Japan Diabetes Society to National

- 1  
2 Glycohemoglobin Standardization Program values. *J Diabetes Investig*  
3  
4  
5 2012;3:39–40.  
6  
7  
8 33. Matsuo S, Imai E, Horio M, et al. Revised equations for estimated GFR from serum  
9  
10 creatinine in Japan. *Am J Kidney Dis* 2009;53:982–92.  
11  
12  
13 34. Das K, Das K, Mukherjee PS, et al. Nonobese population in a developing country  
14  
15 has a high prevalence of nonalcoholic fatty liver and significant liver disease.  
16  
17  
18  
19  
20  
21  
22  
23 35. Gautron L, Elmquist JK. Sixteen years and counting: an update on leptin in energy  
24  
25 balance. *J Clin Invest* 2011;121:2087–93.  
26  
27  
28 36. Dentin R, Pégrier JP, Benhamed F, et al. Hepatic glucokinase is required for the  
29  
30 synergistic action of ChREBP and SREBP-1c on glycolytic and lipogenic gene  
31  
32 expression. *J Biol Chem* 2004;279:20314–26.  
33  
34  
35  
36 37. Muneyuki T, Nakajima K, Aoki A, et al. Latent associations of low serum amylase  
37  
38 with decreased plasma insulin levels and insulin resistance in asymptomatic  
39  
40 middle-aged adults. *Cardiovasc Diabetol* 2012;11:80.  
41  
42  
43  
44  
45 38. van Geenen EJ, Smits MM, Schreuder TC, et al. Nonalcoholic fatty liver disease is  
46  
47 related to nonalcoholic fatty pancreas disease. *Pancreas* 2010;39:1185–90.  
48  
49  
50  
51 39. Sepe PS, Ohri A, Sanaka S, et al. A prospective evaluation of fatty pancreas by  
52  
53 using EUS. *Gastrointest Endosc* 2011;73:987–93.  
54  
55  
56  
57 40. Mathur A, Marine M, Lu D, et al. Nonalcoholic fatty pancreas disease. *HPB*  
58  
59  
60

- 1  
2  
3  
4  
5  
6  
7  
8  
9  
10  
11  
12  
13  
14  
15  
16  
17  
18  
19  
20  
21  
22  
23  
24  
25  
26  
27  
28  
29  
30  
31  
32  
33  
34  
35  
36  
37  
38  
39  
40  
41  
42  
43  
44  
45  
46  
47  
48  
49  
50  
51  
52  
53  
54  
55  
56  
57  
58  
59  
60
- (Oxford) 2007;9:312–8.
41. Sookoian S, Pirola CJ. Meta-analysis of the influence of I148M variant of  
patatin-like phospholipase domain containing 3 gene (PNPLA3) on the  
susceptibility and histological severity of nonalcoholic fatty liver disease.  
*Hepatology* 2011;53:1883–94.
42. Dubuquoy C, Robichon C, Lasnier F, et al. Distinct regulation of  
adiponutrin/PNPLA3 gene expression by the transcription factors ChREBP and  
SREBP1c in mouse and human hepatocytes. *J Hepatol* 2011;55:145–53.
43. Reaven G. Wanted!: a standardized measurement of plasma insulin concentration.  
*Arterioscler Thromb Vasc Biol* 2011;31:954–55.
44. Robins SJ, Lyass A, Zachariah JP, et al. Insulin resistance and the relationship of a  
dyslipidemia to coronary heart disease: the Framingham Heart Study. *Arterioscler  
Thromb Vasc Biol* 2011;31:1208–14.
45. Williams AL, Hoofnagle JH. Ratio of serum aspartate to alanine aminotransferase  
in chronic hepatitis. Relationship to cirrhosis. *Gastroenterology* 1988;95:734–9.
46. Angulo P, Hui JM, Marchesini G, et al. The NAFLD fibrosis score: a noninvasive  
system that identifies liver fibrosis in patients with NAFLD. *Hepatology*  
2007;45:846–54.
47. McPherson S, Stewart SF, Henderson E, et al. Simple non-invasive fibrosis scoring  
systems can reliably exclude advanced fibrosis in patients with non-alcoholic fatty



- 1  
2 liver disease. *Gut* 2010;59:1265–9.  
3  
4  
5 48. Okanoue T, Umemura A, Yasui K, et al. Nonalcoholic fatty liver disease and  
6  
7 nonalcoholic steatohepatitis in Japan. *J Gastroenterol Hepatol* 2011;26 Suppl  
8  
9 1:153–62.  
10  
11  
12  
13 49. Joseph AE, Saverymuttu SH, al-Sam S, et al. Comparison of liver histology with  
14  
15 ultrasonography in assessing diffuse parenchymal liver disease. *Clin Radiol*  
16  
17 1991;43:26–31.  
18  
19  
20  
21  
22 50. Schwenzer NF, Springer F, Schraml C, et al. Non-invasive assessment and  
23  
24 quantification of liver steatosis by ultrasound, computed tomography and magnetic  
25  
26 resonance. *J Hepatol* 2009;51:433–45.  
27  
28  
29  
30  
31 51. Wong VW, Chu WC, Wong GL, et al. Prevalence of non-alcoholic fatty liver  
32  
33 disease and advanced fibrosis in Hong Kong Chinese: a population study using  
34  
35 proton-magnetic resonance spectroscopy and transient elastography. *Gut*  
36  
37 2012;61:409–15.  
38  
39  
40  
41  
42 52. Shepard CW, Finelli L, Alter MJ. Global epidemiology of hepatitis C virus  
43  
44 infection. *Lancet Infect Dis* 2005;5:558–67.  
45  
46  
47  
48 53. Hanafiah KM, Groeger J, Flaxman AD, et al. Global epidemiology of hepatitis C  
49  
50 virus infection: New estimates of age-specific antibody to hepatitis C virus  
51  
52 seroprevalence. *Hepatology* 2012 Nov 21.  
53  
54  
55  
56  
57 54. Pattullo V, Douglas MW, George J. Organelle dysfunction in hepatitis C  
58  
59  
60

1 virus-associated steatosis: anything to learn from nonalcoholic steatohepatitis?  
2  
3

4 *Expert Rev Gastroenterol Hepatol* 2011;5:265–77.  
5  
6

7 55. Kumagi T, Heathcote EJ. Primary biliary cirrhosis. *Orphanet J Rare Dis* 2008;3:1.  
8  
9

10 56. Strassburg CP. Autoimmune hepatitis. *Best Pract Res Clin Gastroenterol*  
11  
12

13 2010;24:667–82.  
14  
15

16 57. Oh RC, Husted TR. Causes and evaluation of mildly elevated liver transaminase  
17  
18

19 levels. *Am Fam Physician* 2011;84:1003–8.  
20  
21  
22  
23  
24  
25  
26  
27  
28  
29  
30  
31  
32  
33  
34  
35  
36  
37  
38  
39  
40  
41  
42  
43  
44  
45  
46  
47  
48  
49  
50  
51  
52  
53  
54  
55  
56  
57  
58  
59  
60

**Figure Legends**

**Figure 1** Serum amylase levels according to the grade of NAFLD and sex. Serum amylase levels decreased significantly with advancing grade of NAFLD in both sexes (ANOVA, both  $P = 0.0001$ ). There was no significant difference between men and women (two-way ANOVA,  $P = 0.45$ ). \*Number of subjects in each group. Bars represent standard errors.

**Figure 2** Serum amylase levels according to the grade of NAFLD and obesity. Obesity was defined as  $BMI \geq 25.0 \text{ kg/m}^2$ . Serum amylase levels decreased significantly with advancing grade of NAFLD in lean subjects (ANOVA,  $P = 0.01$ ), but not in obese subjects ( $P = 0.33$ ). An overall significant difference was observed between lean and obese subjects (two-way ANOVA,  $P = 0.03$ ). \*Number of subjects in each group; † $P = 0.0001$  and ‡ $P = 0.02$  for lean versus obese subjects (Mann–Whitney  $U$  test). Bars represent standard errors.

**Supplement Figure 1**

Exclusion criteria of subjects and flow chart

**Table 1. Characteristics of subjects stratified according to quartiles of serum amylase**

|                                    | Total       | Q1 (Highest) | Q2          | Q3          | Q4 (Lowest) | <i>P</i> value |
|------------------------------------|-------------|--------------|-------------|-------------|-------------|----------------|
| n                                  | 1,475       | 369          | 371         | 381         | 354         |                |
| Age, y                             | 55.1 ± 12.2 | 58.4 ± 11.8  | 56.4 ± 12.2 | 52.9 ± 11.7 | 52.7 ± 12.0 | < 0.0001       |
| Men, n (%)                         | 747 (50.6)  | 178 (48.2)   | 176 (47.4)  | 205 (53.8)  | 188 (53.1)  | 0.19           |
| BMI, kg/m <sup>2</sup>             | 23.0 ± 3.2  | 21.9 ± 2.7   | 22.6 ± 3.2  | 23.3 ± 3.1  | 24.1 ± 3.4  | < 0.0001       |
| WC, cm                             | 80.8 ± 8.9  | 78.2 ± 8.3   | 79.9 ± 8.8  | 81.8 ± 8.8  | 83.2 ± 9.1  | < 0.0001       |
| Systolic blood pressure, mmHg      | 120 ± 18.9  | 119 ± 18.5   | 119 ± 18.7  | 120 ± 18.9  | 123 ± 19.1  | 0.007          |
| Diastolic blood pressure, mmHg     | 74.1 ± 12.6 | 72.6 ± 12.2  | 73.1 ± 11.9 | 74.5 ± 13.4 | 76.1 ± 12.4 | 0.0009         |
| Platelet count, 10 <sup>9</sup> /L | 235 ± 53.4  | 228 ± 53.8   | 235 ± 53.1  | 237 ± 51.1  | 241 ± 55.2  | 0.01           |
| ALT, IU/l                          | 18 (14–25)  | 18 (14–23)   | 17 (14–23)  | 18 (14–25)  | 19 (14–29)  | < 0.0001       |
| AST, IU/l                          | 20 (17–24)  | 21 (19–25)   | 20 (17–24)  | 19 (17–23)  | 20 (17–24)  | 0.04           |
| AST/ALT                            | 1.15 ± 0.36 | 1.24 ± 0.35  | 1.20 ± 0.37 | 1.12 ± 0.33 | 1.04 ± 0.35 | < 0.0001       |

|                                   |                  |                  |                  |                  |                  |          |
|-----------------------------------|------------------|------------------|------------------|------------------|------------------|----------|
| FIB-4                             | 1.13 (0.82–1.52) | 1.33 (0.98–1.76) | 1.20 (0.89–1.59) | 1.05 (0.76–1.38) | 0.98 (0.70–1.36) | < 0.0001 |
| GGT, IU/l                         | 22 (16–33)       | 20 (15–31)       | 20 (16–30)       | 23 (16–34)       | 24 (17–38)       | 0.0009   |
| C-reactive protein                | 0.4 (0.3–0.8)    | 0.3 (0.3–0.63)   | 0.4 (0.3–0.8)    | 0.4 (0.3–0.8)    | 0.5 (0.3–1.1)    | < 0.0001 |
| Amylase, IU/l                     | 77.3 ± 24.9      | 110 ± 22.0       | 81.3 ± 4.7       | 66.6 ± 4.1       | 50.3 ± 7.0       | —        |
| (range)                           | (30–200)         | (90–200)         | (74–89)          | (60–73)          | (30–59)          |          |
| Triglyceride, mg/dl               | 88 (64–128)      | 83 (63–121)      | 84 (62–123)      | 88 (65–128)      | 100 (65–143)     | 0.001    |
| HDL-cholesterol, mg/dl            | 61.2 ± 15.0      | 64.2 ± 15.4      | 62.6 ± 14.8      | 59.8 ± 14.6      | 58.3 ± 14.5      | < 0.0001 |
| Fasting plasma glucose, mg/dl     | 99.6 ± 16.7      | 97.5 ± 13.4      | 97.4 ± 11.4      | 101 ± 19.4       | 103 ± 20.4       | < 0.0001 |
| HbA1c (NGSP), %                   | 5.7 ± 0.6        | 5.7 ± 0.5        | 5.7 ± 0.4        | 5.7 ± 0.6        | 5.8 ± 0.7        | 0.14     |
| eGFR, ml/min/1.73m <sup>2</sup>   | 75.0 ± 13.9      | 71.0 ± 14.3      | 74.3 ± 12.9      | 76.0 ± 14.2      | 78.7 ± 13.1      | < 0.0001 |
| ATP-III-Metabolic syndrome, n (%) | 139 (9.4)        | 16 (4.3)         | 23 (6.2)         | 47 (12.3)        | 53 (15.0)        | < 0.0001 |
| Diabetes, n (%)                   | 114 (7.7)        | 19 (5.1)         | 17 (4.6)         | 34 (8.9)         | 44 (12.4)        | 0.0002   |
| NAFLD of all grades, n (%)        | 463 (31.4)       | 83 (22.5)        | 97 (26.1)        | 133 (34.9)       | 150 (42.4)       | < 0.0001 |

|                                   |            |           |           |           |           |          |
|-----------------------------------|------------|-----------|-----------|-----------|-----------|----------|
| Moderate to severe NAFLD, n (%)   | 221 (15.0) | 34 (9.2)  | 42 (11.3) | 60 (15.7) | 85 (24.0) | < 0.0001 |
| Gallstones, n (%)                 | 81 (5.5)   | 21 (5.7)  | 20 (5.4)  | 24 (6.3)  | 16 (5.2)  | 0.76     |
| Cholecystectomy, n (%)            | 23 (1.6)   | 5 (1.4)   | 3 (0.8)   | 5 (1.3)   | 10 (2.8)  | 0.15     |
| Splenomegaly, n (%)               | 9 (0.6)    | 1 (0.3)   | 1 (0.3)   | 0         | 7 (2.0)   | —*       |
| Medical history of                |            |           |           |           |           |          |
| Cardiovascular diseases, n (%)    | 55 (3.7)   | 11 (3.0)  | 20 (5.4)  | 11 (2.9)  | 13 (3.7)  | 0.24     |
| Stroke, n (%)                     | 26 (1.8)   | 12 (3.3)  | 6 (1.6)   | 4 (1.1)   | 4 (1.1)   | 0.08     |
| Medications for                   |            |           |           |           |           |          |
| Hypertension, n (%)               | 237 (16.1) | 64 (17.3) | 47 (12.7) | 67 (17.6) | 59 (16.7) | 0.22     |
| Hypercholesterolemia, n (%)       | 177 (12.0) | 56 (15.2) | 43 (11.6) | 34 (8.9)  | 44 (12.4) | 0.07     |
| Diabetes, n (%)                   | 56 (3.8)   | 12 (3.3)  | 12 (3.2)  | 15 (3.9)  | 17 (4.8)  | 0.65     |
| Current smoker, n (%)             | 273 (18.5) | 40 (10.8) | 50 (13.5) | 86 (22.6) | 97 (27.4) | < 0.0001 |
| Everyday alcohol consumers, n (%) | 229 (15.5) | 51 (13.8) | 59 (15.9) | 66 (17.3) | 53 (15.0) | 0.61     |

---

|                         |            |            |            |            |            |      |
|-------------------------|------------|------------|------------|------------|------------|------|
| Regular exercise, n (%) | 507 (34.4) | 144 (39.0) | 135 (36.4) | 125 (32.9) | 103 (29.1) | 0.03 |
|-------------------------|------------|------------|------------|------------|------------|------|

---

Data are means ±SD and medians (interquartile range). *P*-values for continuous variables and categorical variables were determined by analysis of variance and the  $\chi^2$

test, respectively. Regular exercise:  $\geq 30$  min exercise per session at least twice a week.

\*Statistical analysis was not performed because of the small number of subjects with splenomegaly.

For peer review only

**Table 2. Odds ratios for NAFLD-AG according to serum amylase quartiles**

| Serum amylase quartiles | Q1 (Highest) | Q2               | Q3               | Q4 (Lowest)      | <i>P</i> for trend |
|-------------------------|--------------|------------------|------------------|------------------|--------------------|
| n                       | 369          | 371              | 381              | 354              |                    |
| Model 1                 | 1            | 1.22 (0.87–1.71) | 1.85 (1.34–2.55) | 2.53 (1.84–3.50) | < 0.0001           |
| Model 2                 | 1            | 1.28 (0.91–1.81) | 1.96 (1.39–2.74) | 2.74 (1.95–3.85) | < 0.0001           |
| Model 3                 | 1            | 1.35 (0.93–1.97) | 2.03 (1.41–2.94) | 2.41 (1.66–3.51) | < 0.0001           |
| Model 4                 | 1            | 1.25 (0.86–1.82) | 1.83 (1.26–2.65) | 2.18 (1.49–3.18) | < 0.0001           |
| Model 5                 | 1            | 1.31 (0.90–1.90) | 2.00 (1.39–2.89) | 2.36 (1.62–3.44) | < 0.0001           |
| Model 6                 | 1            | 0.99 (0.66–1.49) | 1.34 (0.89–2.01) | 1.42 (0.94–2.15) | 0.04               |
| Model 7                 | 1            | 1.02 (0.68–1.53) | 1.30 (0.87–1.94) | 1.49 (0.99–2.24) | 0.03               |

Model 1: unadjusted.

Model 2: adjusted for age, sex, and current smoking (*versus* non-smokers).

Model 3: Model 2 plus adjustment for log-transformed ALT, regular exercise (*versus* infrequent exercise), daily alcohol consumption (*versus* infrequent/no alcohol)



1  
2  
3  
4  
5  
6  
7  
8  
9  
10  
11  
12  
13  
14  
15  
16  
17  
18  
19  
20  
21  
22  
23  
24  
25  
26  
27  
28  
29  
30  
31  
32  
33  
34  
35  
36  
37  
38  
39  
40  
41  
42  
43  
44  
45  
46  
47  
48  
49

consumption), eGFR, past history of heart diseases and stroke, and medications for hypertension, diabetes, and dyslipidemia.

Model 4: Model 3 plus adjustment for diabetes, but excluding medications for hypertension, diabetes, and dyslipidemia.

Model 5: Model 3 plus adjustment for metabolic syndrome, but excluding medications for hypertension, diabetes, and dyslipidemia.

Model 6: Model 3 plus adjustment for BMI.

Model 7: Model 3 plus adjustment for WC.

For peer review only

**Table 3. Odds ratios of each serum amylase for NAFLD of moderate or severe grade**

| Serum amylase quartiles | Q1 (Highest) | Q2               | Q3               | Q4 (Lowest)      | <i>P</i> for trend |
|-------------------------|--------------|------------------|------------------|------------------|--------------------|
| N*                      | 320          | 316              | 308              | 289              |                    |
| Model 1                 | 1            | 1.29 (0.80–2.09) | 2.04 (1.29–3.20) | 3.51 (2.27–5.42) | < 0.0001           |
| Model 2                 | 1            | 1.36 (0.83–2.22) | 2.14 (1.33–3.44) | 3.81 (2.40–6.05) | < 0.0001           |
| Model 3                 | 1            | 1.61 (0.91–2.86) | 2.32 (1.32–4.07) | 3.45 (1.99–6.00) | < 0.0001           |
| Model 4                 | 1            | 1.48 (0.84–2.64) | 2.11 (1.19–3.73) | 2.97 (1.70–5.20) | < 0.0001           |
| Model 5                 | 1            | 1.56 (0.89–2.75) | 2.32 (1.33–4.04) | 3.26 (1.88–5.66) | < 0.0001           |
| Model 6                 | 1            | 1.05 (0.54–2.03) | 1.44 (0.76–2.72) | 2.01 (1.07–3.78) | 0.01               |
| Model 7                 | 1            | 1.06 (0.55–2.05) | 1.37 (0.73–2.59) | 2.06 (1.09–3.87) | 0.01               |

\*Subjects with mild NAFLD (n = 242) were excluded from this analysis. Models 1–7 are the same as those in **Table 2**.

1  
2  
3  
4  
5  
6  
7  
8  
9  
10  
11  
12  
13  
14  
15  
16  
17  
18  
19  
20  
21  
22  
23  
24  
25  
26  
27  
28  
29  
30  
31  
32  
33  
34  
35  
36  
37  
38  
39  
40  
41  
42  
43  
44  
45  
46  
47  
48  
49  
50  
51  
52  
53  
54  
55  
56  
57  
58  
59  
60

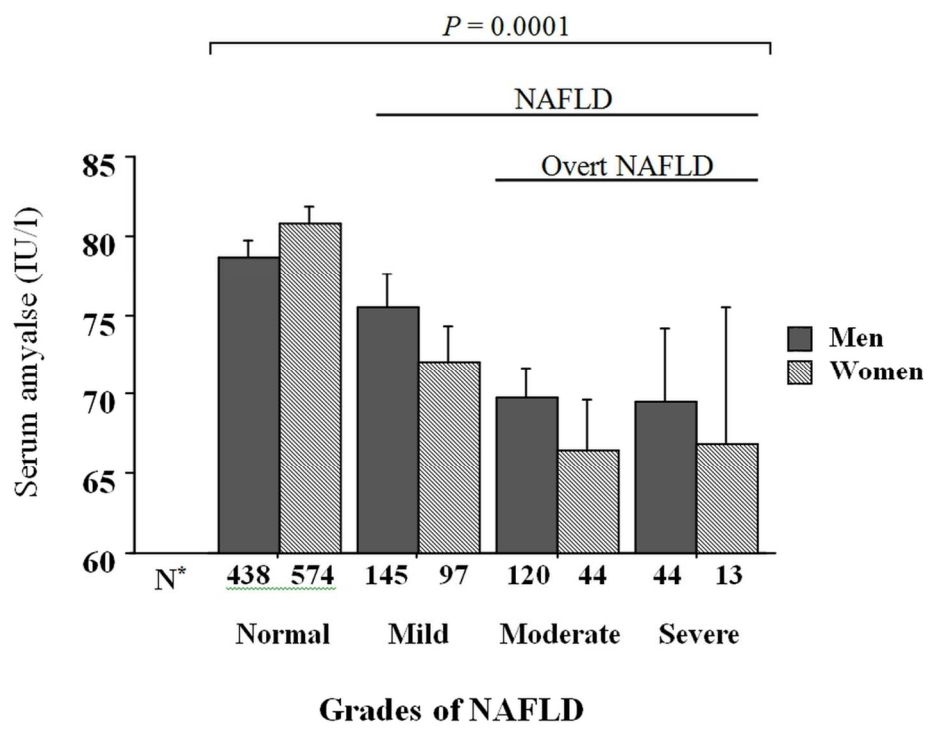

117x90mm (300 x 300 DPI)

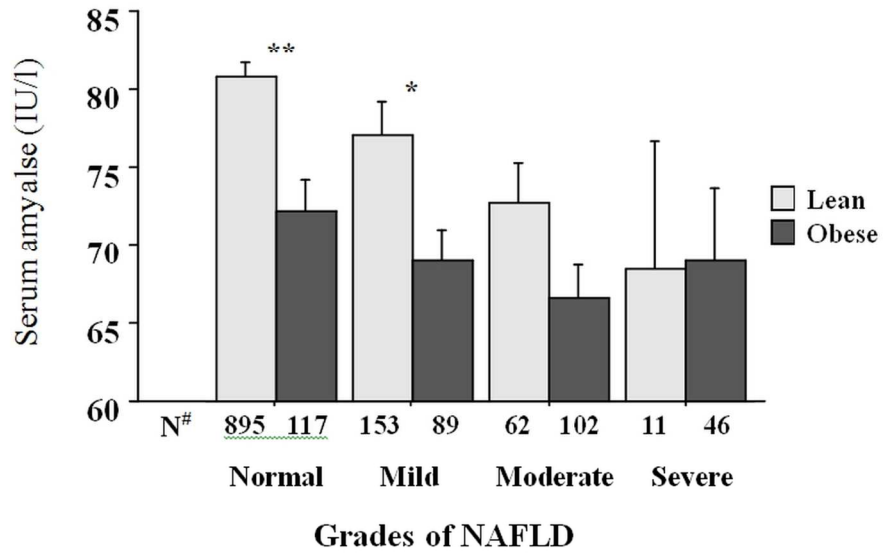

129x90mm (300 x 300 DPI)

view only

## Exclusion criteria of subjects and flow chart

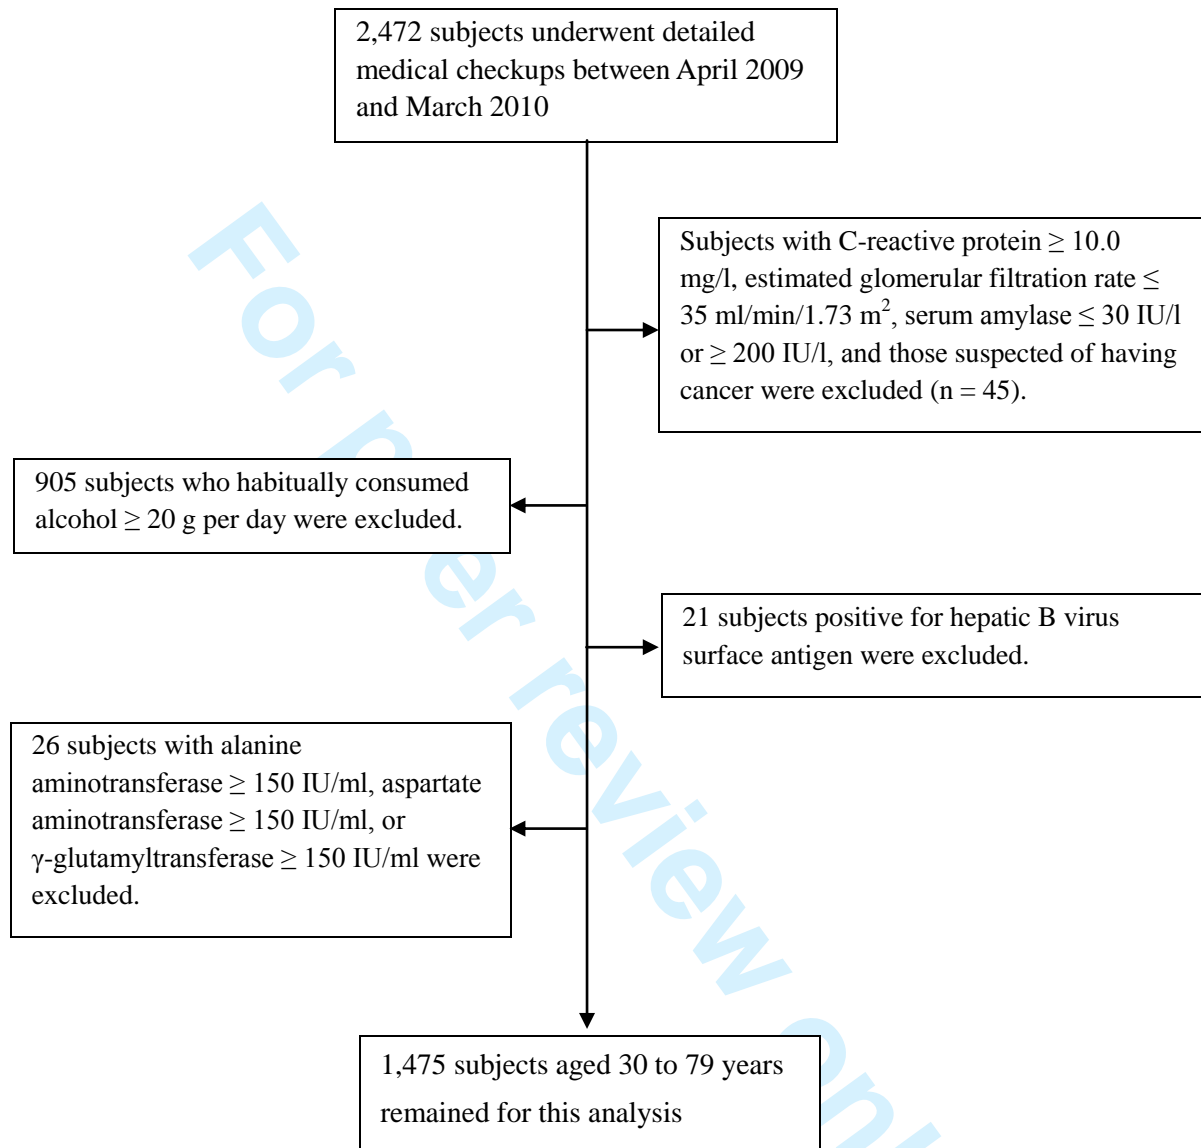

Supplement: bmjopen-2012-002235.draft_revisions.pdf [file bmjopen-2012-002235.draft_revisions.pdf]
